1 SIV and *Mycobacterium tuberculosis* synergy within the granuloma accelerates the reactivation pattern of  
2 latent tuberculosis  
3

4 Collin R Diedrich<sup>1,2</sup>, Tara Rutledge<sup>1,2</sup>, Pauline Maiello<sup>2,3</sup>, Tonilynn M Baranowski<sup>1,2,3</sup>, Alexander G White<sup>2,3</sup>, H.  
5 Jacob Borish<sup>2,3</sup>, Paul Karell<sup>1,2</sup>, Forrest Hopkins<sup>4</sup>, Jessica Brown<sup>4</sup>, Sarah M Fortune<sup>4</sup>, JoAnne L Flynn<sup>2,3</sup>,  
6 Zandrea Ambrose<sup>3</sup>, Philana Ling Lin<sup>1,2#</sup>

7  
8 <sup>1</sup>Department of Pediatrics, Children's Hospital of Pittsburgh of the University of Pittsburgh Medical Center,  
9 Pittsburgh, Pennsylvania, USA

10  
11 <sup>2</sup>Center for Vaccine Research, University of Pittsburgh School of Medicine, Pittsburgh, Pennsylvania, USA

12  
13 <sup>3</sup>Department of Microbiology and Molecular Genetics, University of Pittsburgh School of Medicine, Pittsburgh,  
14 Pennsylvania, USA

15  
16 <sup>4</sup>Department of Immunology and Infectious Diseases, Harvard T. H. Chan School of Public Health, Boston,  
17 Massachusetts, USA

18  
19  
20 Short title: SIV and *M. tuberculosis* synergy within granulomas accelerates TB

21  
22 **#Correspondence to:**

23 Philana Ling Lin, MD, M Sc

24 Associate Professor

25 Department of Pediatrics

26  
27 Division of Infectious Diseases

28 Children's Hospital of Pittsburgh of UPMC

29 University of Pittsburgh School of Medicine

30 2310 AOB

31 4401 Penn Avenue

32 Pittsburgh, PA 15224

33 Phone: (412) 692-9460

34 Fax: (412) 692-7016

35 email: [philana.lin@chp.edu](mailto:philana.lin@chp.edu)

36

37

38

39  
40 **Abstract**  
41

42 Human immunodeficiency virus infection is the most common risk factor for severe forms of tuberculosis (TB),  
43 regardless of CD4 T cell count. Using a well-characterized cynomolgus macaque model of human TB, we  
44 compared radiographic, immunologic and microbiologic characteristics of early (subclinical) reactivation of  
45 latent *M. tuberculosis* (Mtb) infection among animals subsequently infected with simian immunodeficiency virus  
46 (SIV) or who underwent anti-CD4 depletion by a depletion antibody. CD4 depleted animals had significantly  
47 fewer CD4 T cells within granulomas compared to Mtb/SIV co-infected and Mtb-only control animals. After 2  
48 months of treatment, subclinical reactivation occurred at similar rates among CD4 depleted (5 of 7 animals)  
49 and SIV infected animals (4 of 8 animals). However, SIV-induced reactivation was associated with more  
50 dissemination of lung granulomas that were permissive to Mtb growth resulting in greater bacterial burden  
51 within granulomas compared to CD4 depleted reactivators. Granulomas from Mtb/SIV animals displayed a  
52 more robust T cell activation profile (IFN- $\alpha$ , IFN- $\gamma$ , TNF, IL-17, IL-2, IL-10, IL-4 and granzyme B) compared to  
53 Mtb/ $\alpha$ CD4 animals and controls though these effectors did not protect against reactivation or dissemination,  
54 but instead may be related to increased viral and/or Mtb antigens. SIV replication within the granuloma was  
55 associated with reactivation, greater overall Mtb growth and Mtb killing resulting in greater overall Mtb burden.  
56 These data support that SIV disrupts protective immune responses against latent Mtb infection beyond the loss  
57 of CD4 T cells, and that synergy between SIV and Mtb occurs within granulomas.

58  
59 **Author Summary**

60 Most humans are able to control infection with *Mycobacterium tuberculosis* (Mtb), the bacteria that causes  
61 tuberculosis (TB). Controlled, asymptomatic infection (latent infection) can develop into symptomatic, severe  
62 TB (reactivation TB) when the immune system is impaired, and HIV is the most common risk factor. Chronic  
63 HIV infection is associated with low CD4 T cells but there are likely other factors involved. Using macaques  
64 with latent Mtb infection, we could induce reactivation from either CD4 T cell depletion or SIV infection. We  
65 found that SIV induced reactivation was more dramatic with more bacterial dissemination and bacterial growth  
66 compared to those with CD4 depletion. While SIV-infected animals had more activated immune responses in  
67 the lung granulomas (a collection of immune cells that functions to combat Mtb), they could not prevent

68 bacterial spread of Mtb resulting in more TB pathology, higher bacterial burden and disease throughout the  
69 body. These data suggest that the HIV-induced reactivation TB is not solely from the loss of CD4 T cells.  
70 Furthermore, our data suggest that SIV and Mtb have a synergistic relationship within granulomas that impairs  
71 the ability to kill Mtb and that this relationship exacerbates TB disease.

## 73 Introduction

74 Tuberculosis (TB) continues to be a major health concern, with an estimated 10 million new cases of  
75 TB in 2018. Of the 1.5 million TB deaths that year, an estimated 251,000 were in human immunodeficiency  
76 virus (HIV)-infected individuals [1]. The majority (~90%) of immune competent individuals infected with  
77 *Mycobacterium tuberculosis* (Mtb) develop an asymptomatic state of controlled infection called latent infection  
78 (LTBI), while others develop symptomatic or active TB [1]. HIV infection increases host susceptibility to TB [2]  
79 and pathology [3], including primary TB (symptomatic TB that develops soon after Mtb infection) or reactivation  
80 of LTBI. HIV-infected individuals are approximately 9 times more likely to develop reactivation from LTBI than  
81 HIV-uninfected individuals [4]. TB incidence in HIV+ persons increases as peripheral CD4 T cell numbers  
82 decline, suggesting that CD4 T cells are important in control of Mtb infection [2], which is supported by animal  
83 model studies [5]. However, HIV-infected individuals with normal peripheral CD4 T cell counts are still more  
84 susceptible to active TB than their HIV-uninfected counterparts [2, 3]. This leads to the hypothesis that the HIV-  
85 associated increase in TB susceptibility is not solely due to the loss of CD4 T cells.

86 The histopathologic hallmark of TB is the granuloma. Granulomas are organized immunological  
87 structures composed of T cells, macrophages, B cells, NK cells, dendritic cells and other immune cells that  
88 surround Mtb to form both a physical and immunologic barrier to prevent Mtb dissemination. As a respiratory  
89 infection, these granulomas are most prominent in the lung, but can also be present in the mediastinal lymph  
90 nodes and other organs (reviewed in [6]). While granulomas can kill Mtb under optimal immune conditions,  
91 they can also be a site for bacterial persistence and/or growth particularly during latent infection. Cynomolgus  
92 macaques infected with low dose Mtb develop the full spectrum of human infection outcomes, from latent to  
93 active TB, with histopathologic features of granulomas nearly identical to human [7, 8]. From this model, we  
94 have learned that the immune factors within each granuloma are variable and complex, reflecting a delicate  
95 balance between pro- and anti-inflammatory cytokines necessary for optimal function [9].

96 Human studies that examine *M. tuberculosis* granulomas within HIV-coinfected individuals are  
97 informative but highly variable [10], necessitating non-human primate (NHP) models to understand how *M.*  
98 *tuberculosis* granulomas change during co-infection. NHP are an invaluable animal model to study SIV and  
99 *Mtb* co-infection [11-17]. Use of these models facilitates a more in-depth understanding of how pre-existing  
100 infection can influence the outcome of co-infection and the immunologic mechanisms of worsening disease. In  
101 human co-infection, it is not generally known which infection occurred first (HIV or *Mtb*) or the duration of each  
102 infection before subjects come to clinical attention. SIV infection prior to *Mtb* infection was associated with  
103 increased acute TB pathology with extrapulmonary dissemination and increased bacterial burden [13, 17]. In  
104 contrast, NHPs with established latent *Mtb* infection and subsequent SIV infection had variable rates of  
105 reactivation TB depending on the time point after SIV infection [11, 14, 15]. These studies of SIV-induced  
106 reactivation of LTBI have suggested that loss of CD4 T cells can contribute to reactivation of LTBI but likely  
107 CD4 T cell independent mechanisms are important as well [11, 12, 15, 16]. In our previous studies, SIV  
108 infection of cynomolgus macaques with LTBI induced reactivation in all animals [11, 12], with some reactivating  
109 early after SIV infection while others did not reactivate until up to 10 months after SIV infection. Early  
110 reactivation was associated with greater peripheral CD4 T cell depletion within the first 8 weeks suggesting  
111 that CD4 T cells played an important role in one aspect of reactivation but not in all cases [11, 12]. Similarly,  
112 latently *Mtb*-infected NHP given humanized CD4 depletion antibody had a 50% reactivation rate [5], where  
113 reactivation was associated with more severe depletion of CD4 T cells in the mediastinal lymph nodes and not  
114 with extent of peripheral CD4 depletion [5]. These studies and those of others [11, 14, 15] have suggested that  
115 granuloma specific responses (including resident CD4 T cell function) are more critical than peripheral CD4 T  
116 cell counts.

117 The advent of more sophisticated tools to assess pathogenesis, bacterial dissemination and disease  
118 progression have improved our understanding of how LTBI is established and the events that result in  
119 reactivation. Using positron emission tomography and computed tomography (PET CT), we have shown that a  
120 variety of patterns exist in clinically defined LTBI and this spectrum of latency influences the risk of tumor  
121 necrosis factor (TNF)-neutralization-induced reactivation [18]. In that study, the risk of reactivation was  
122 associated with specific PET CT characteristics including overall lung inflammation and individual  
123 characteristics of lung granulomas [18]. This latter finding is consistent with previous published data that

124 granulomas are independent from each other with their own bacterial burden and immune response [9, 19].  
125 HIV-infected humans with LTBI who had PET CT-identified subclinical TB disease were more likely to develop  
126 clinical disease than those without subclinical pathology [20], demonstrating the similarities between humans  
127 and this NHP model.

128 In prior studies, reactivation of LTBI was defined by NHP displaying overt signs of disease (e.g.,  
129 coughing, weight loss, respiratory distress, abnormal X-ray) [5, 11, 12]. Here, we extend our previous studies  
130 to compare the radiologic, immunologic, and microbiologic characteristics during the earliest phases of  
131 reactivation TB before overwhelming disease pathology and bacterial burden occurs, which could potentially  
132 bias interpretation of immune data. We previously established the rates of reactivation after LTBI in both CD4  
133 depleted and SIV<sub>mac251</sub> infected animals and therefore could predict when early, subclinical reactivation would  
134 begin. Moreover, we also established a method to detect subclinical reactivation where the formation of new  
135 granulomas detected by PET CT during established LTBI indicated a disruption within the host immune  
136 response before NHP showed signs of overt clinical reactivation [18]. Thus, NHP with established LTBI  
137 underwent SIV infection (Mtb/SIV),  $\alpha$ CD4 depletion antibody treatment (Mtb/ $\alpha$ CD4), or no immune suppression  
138 (Mtb-only, controls) and were serially assessed by PET CT with granuloma specific bacterial burden, SIV  
139 replication, pathology, immunology, and disease progression compared at necropsy. Despite having more  
140 CD4 T cells than Mtb/ $\alpha$ CD4 macaques, Mtb/SIV-coinfected animals had greater dissemination of lung  
141 granulomas observed by PET CT and confirmed at necropsy that were more permissive to Mtb growth. SIV  
142 replication within individual granulomas was associated with reactivation occurrence, reduced Mtb killing and  
143 increased Mtb growth. The frequency and functional profiles of T cells within granulomas differed significantly  
144 between Mtb/SIV and Mtb/ $\alpha$ CD4 groups during subclinical reactivation. These data support that SIV infection  
145 has multiple mechanisms of disrupting the protective immune response against Mtb that are independent of  
146 CD4 depletion, and that SIV exerts local effects on the immune response and Mtb within individual granulomas  
147 highlighting the synergy between SIV and Mtb within individual granulomas.

## 149 **Methods**

### 151 Animals

152 Adult (> 4 years of age) cynomolgus macaques (*Macaca fascicularis*) were screened for other co-  
153 morbidities (e.g., parasites, SIV, Mtb) before challenge (Valley Biosystems, Sacramento, CA). Animals were  
154 infected with low dose (~ 15 CFU per monkey) of *M. tuberculosis* (barcoded Erdman strain [21]) via  
155 bronchoscopic instillation to the lower lung lobe and housed in Biosafety Level 3 (BSL-3) NHP facility.  
156 Cynomolgus macaques inoculated with Erdman *M. tuberculosis* was used in this study because latent and  
157 active *M. tuberculosis* infection has been extensively characterized [5, 7-9, 11, 12, 18, 19, 21-24]. Mtb infection  
158 was confirmed by the detection of TB-specific lesions on serial PET CT scans and identified at necropsy. As in  
159 prior studies in this LTBI model, asymptomatic animals with no culturable Mtb in bronchoalveolar lavage (BAL)  
160 or gastric aspirate samples, and normal erythrocyte sedimentation rate (ESR, marker of systemic  
161 inflammation) were declared with LTBI at 6 months post-Mtb infection, similar to human clinical definitions [7].  
162 Animals that developed active TB were excluded and moved to a different study. After latent Mtb infection was  
163 established, animals were randomized to receive either intravenous challenge with a viral swarm SIV<sub>mac251</sub>  
164 (1.67x10<sup>5</sup> viral RNA copies) [11, 12] (n=8), CD4 depletion (rhesus recombinant depleting CD4 antibody,  
165 50mg/kg/dose IV every 2 weeks until necropsy [5]) (n=7), saline (Mtb-only control, n=6) for 8 weeks.  
166 Stratification into treatment groups was based on the total lung FDG activity by PET CT to ensure that there  
167 was no potential bias toward reactivation within any experimental group as increased total lung FDG activity  
168 was associated with increased risk of reactivation during TNF neutralization [18]. Four macaques were infected  
169 with SIV<sub>mac251</sub> only for 8 weeks as a SIV-only control group.

170 Blood was obtained via venipuncture for isolation of peripheral blood mononuclear cells (PBMC) every 1-4  
171 weeks as previously described [18]. Bronchoalveolar lavage (BAL) was performed and peripheral (axillary or  
172 inguinal) lymph nodes (pLN) were biopsied to measure tissue specific CD4 depletion in both SIV and CD4  
173 depletion groups at serial time points (0, 3 and 7 weeks after SIV infection or CD4 depletion), as previously  
174 described [11].

## 176 PET-CT imaging and analysis

177 *In vivo* disease progression was assessed using PET co-registered with CT with a microPET Focus 220  
178 preclinical PET scanner (Siemens Medical Solutions) and clinical 8 slice helical CT scanner (NeuroLogica Corp)  
179 as previously described [24, 25]. The PET probe used was 2-deoxy-2-<sup>18</sup>F-D-deoxyglucose (FDG) as we have  
180 previously shown that this can be used to identify TB lesions [24]. PET CT scans were performed every four  
181 weeks after Mtb infection until 6 months post-infection when latent Mtb infection was declared. Prior to SIV  
182 infection or CD4 depletion, a scan was performed to determine baseline disease and then every 2 weeks until  
183 the time of necropsy (8 weeks later or earlier if signs of clinical deterioration developed). Degree of Mtb  
184 involvement within the lungs and mediastinal lymph nodes was measured using several different parameters as  
185 previously described [25] which included: identification and count of individual granulomas, total lung FDG  
186 activity, single granuloma FDG avidity and size over time, number of mediastinal lymph nodes with increased  
187 FDG avidity with or without the presence of necrosis, presence of extrapulmonary involvement (e.g., liver  
188 lesions). Each PET CT scan was analyzed by a team of blinded analysts (PM, AGW, HJB).

## 190 Subclinical reactivation of latent *M. tuberculosis* infection by PET CT

191 We previously showed that SIV<sub>mac251</sub> infection caused clinical reactivation in 100% of our latently infected NHP  
192 (defined by signs of disease such as coughing or weight loss, new growth of *M. tuberculosis* by BAL and gastric  
193 aspirates, abnormal X-ray, and increased ESR) between 12-48 weeks post SIV infection [11]. The goal of this  
194 study was to identify the pathologic, microbiologic, and immunologic changes during subclinical reactivation. To  
195 do this, PET CT was used to define reactivation as the formation of a new granuloma (whose presence was  
196 confirmed at necropsy) after latent *M. tuberculosis* infection was established [18]. This more stringent definition  
197 of reactivation allows us to identify these changes before overwhelming clinical signs of disease developed and  
198 immune responses could be completely confounded by profoundly high bacterial burden and pathology.

## 200 Necropsy

At necropsy, Mtb-involved tissue sites (i.e. individual granulomas and other pathologies) were matched by PET CT and harvested for analysis as previously described [17-19, 21, 26]. Gross pathology of TB was quantified by assessing the number, size, and pattern of granulomas distributed within each lung lobe, thoracic lymph nodes and in extrapulmonary sites as previously published [22]. PET CT matched individual granulomas and other tissues harvested at necropsy were homogenized into single cell suspension and plated for Mtb and analyzed by multiparameter flow cytometry [9].

### Ex vivo immunologic assays

Peripheral blood CD4 and CD8 T cell measurements were obtained every 2 weeks after SIV and CD4 depletion. Mtb specific immune responses from tissues were measured by stimulating with Mtb ESAT6-CFP10 peptide pools (10µg/ml of each peptide) or incubated with only media (RPMI+10%hAB). Cells from tissues at necropsy were isolated and stimulated for 4 hours with peptide pools in the presence of Brefeldin A.

Flow cytometry was performed on all isolated cells after stimulation by staining with a combination of antibodies, as described [9]. PBMC and BAL were stained for CD4 and CD8 T cells (CD3, CD4, CD8). Granuloma cells were stained for CD3, CD4, CD8, granzyme B, IL-4, IFN-γ, IL-2, IL-10, IL-17, and TNF. Data acquisition was performed using an LSR II (BD) and analyzed using FlowJo Software v.9.7 (Treestar Inc, Ashland, OR). Only lung granulomas with more than 40 lymphocytes (median: 397, IQR<sub>25-75</sub>: 121-1545) were included in cell frequency analyses to ensure all granulomas contained an accurate estimate. When measuring cytokine production and granzyme B presence, only samples with a minimum of 100 CD3 T cells by flow cytometry (median: 631, IQR<sub>25-75</sub>: 205-14919) were included to ensure precise and accurate measurements, as published [9, 27]. Gating strategies used for analysis are presented using ESAT6-CFP10 stimulated cells from the granuloma (Supplemental Figure 1).

### Viral RNA Quantification

Plasma CD4 and SIV viral RNA copies from each designated timepoint were performed in bulk from filtered (0.45 µm to remove any potential Mtb) plasma samples. RNA extractions from pelleted plasma were performed by QiAmp viral miniRNA protocol (Qiagen, Venlo Netherlands) per the package insert



228 instructions. Tissue specific RNA extraction was performed by first homogenizing tissues into single cell  
229 suspension and freezing samples in a 1:4 ratio of homogenate to Trizol LS (Thermo Fisher Scientific,  
230 Waltham Massachusetts) and stored (-80°C). Tissue RNA extraction was performed using the Direct-zol  
231 RNA miniprep plus kit with DNAase treatment per package insert (Zymo, Irvine, California). SIV and CD4  
232 primers for RT PCR and amplification conditions were as previously published [28]. RT-PCR was performed  
233 using the QuantStudio 6 Real-Time PCR system (Thermo Fisher Scientific, Waltham Massachusetts).

#### 235 Mtb bacterial burden estimates, genome isolation, quantification, Mtb killing and barcode mapping

236 Mtb burden was estimated by colony forming units (CFU) of single cell homogenate from each individual  
237 site, as previously described [18, 22]. Lymph node burden (“LN CFU”) was defined as the sum of CFU from  
238 all mediastinal lymph nodes. Extrapulmonary score (EP score) is a quantitative estimate of extrapulmonary  
239 involvement (e.g., liver, peripancreatic lymph node, paracostal abscess, kidney) for which bacterial growth,  
240 gross or microscopic evidence of Mtb involvement are taken into account [22]. Total bacterial burden  
241 includes the sum of CFU from the lymph nodes (mediastinal and extrapulmonary) and lung lesions (e.g.,  
242 grossly normal lung, granulomas, involved lung, or diaphragm granulomas).

243 Mtb DNA extractions and qPCR for estimating chromosomal equivalents were performed as  
244 previously described [23]. Chromosomal equivalents (CEQ) were assessed relative to a serially diluted  
245 standard curve of *M. tuberculosis* genomic DNA using quantitative real-time PCR; efficiency for each run  
246 was kept between 90% and 110%. Each sample was analyzed in triplicate on a ViiA7 real-time PCR system  
247 (ThermoFisher Scientific, Waltham Massachusetts) with a 384-well block Quantification of CEQ using  
248 primers targeting SigF and iTaq Universal SYBR Green Supermix (Bio-Rad, Hercules, CA).

249 Genetically barcoded Mtb was designed by inserting random identifier tags into the Mtb chromosome  
250 as already published [21]. We previously showed that each granuloma is established by a single individual  
251 Mtb bacillus [19]; and therefore are able to use the digitally barcoded Mtb to facilitate mapping of bacterial  
252 dissemination. Mtb genomes were extracted and sequenced from Mtb colonies grown from individual tissues  
253 (e.g., granulomas, lymph nodes) harvested at necropsy. Individual barcode identities were determined by  
254 Mtb genome sequences via a customized pipeline [21] and each barcode was matched with the 3-

255 dimensional x,y,z coordinates of the lungs on PET CT. Barcodes from granulomas observed prior to immune  
256 suppression and new granulomas that appeared after immune suppression were compared.

### 258 Immunohistochemistry

259 Immunohistochemistry was performed as previously described [23]. A portion of each lung granuloma was  
260 formalin-fixed and paraffin embedded. After deparaffinization of processed slides, antigen retrieval was  
261 performed using boiling EDTA Tris (pH 9) buffer under pressure for 6 minutes. Tissues were blocked using 1%  
262 bovine serum albumin (BSA) and stained for CD3 (1:200, monoclonal rat Ab11089; Abcam Cambridge, MA)  
263 and CD38 (1:1000 polyclonal rabbit A9696, Lifespan Biosciences, Seattle WA) overnight at 4°C. Appropriate  
264 florescent secondary antibodies were used to visualize primary antibodies or as secondary isotype controls.  
265 Dapi was utilized to identify nuclei. Enumeration of CD38 and CD3 co-localization was manually counted.  
266 Images were acquired using a Nikon 90I epi-fluorescent microscope (Nikon, Melville, NY) at 20x objective with  
267 Nikon Elements AR 4.51.00 64-bit.

### 269 Statistics

270 Shapiro-Wilk test was used to test for normality. Treatment groups were compared using a Wilcoxon-exact test  
271 (also known as the Mann-Whitney test) (for 2 group comparison) or a Kruskal-Wallis with Dunn's multiple  
272 comparison adjusted p-values reported (for 3 or more group comparisons) or Steel multiple comparison  
273 adjustment (for 2 comparisons). The Pearson correlation coefficient and corresponding p-values were reported  
274 for relationships among normally-distributed variables and the Spearman correlation coefficient was reported  
275 for nonparametric data. All statistical tests on serial data were performed in JMP Pro 14.0.0 (64-bit, SAS  
276 institute, Cary, NC). For group comparisons on non-serial data, Graphpad Prism Mac OSX (Version 8.2.1,  
277 GraphPad San Diego, CA) was used. For counts (including cell counts, CFU, and FDG activity), the data was  
278 first transformed (adding 1 to entire dataset), so that zeroes could be visualized and analyzed on a log<sub>10</sub> scale.  
279 All statistical tests are two-sided and significance was established at  $p \leq 0.05$ . Permutations tests for  
280 comparison of T cells proportions, presented in pie charts, was performed using SPICE 6.0 (NIH, Bethesda  
281 MD) [29].  
282

283 A principal components analysis was performed (using JMP Pro) on the cytokine expression from  
284 absolute numbers of both CD4 and CD8 cell counts ( $\log_{10}$  transformed) from individual granulomas. Using the  
285 Kaiser criterion (dropping any components with eigenvalues less than 1), the first principal component was  
286 saved as a new variable for both CD4 and CD8 cell types.

287 To ensure against bias from any single animal in our lung granuloma data, the median frequency and  
288 absolute counts of CD4 and CD8 of each animal were calculated and effect sizes between groups examined.  
289 We found similar effect size among the CD4 T cells frequency and absolute CD8 T cells. The CD8 T cell effect  
290 size between SIV and control was inflated due to one animal (31316) but the overall trends were similar. A  
291 similar comparison was performed with the cytokine data used in the principal component analysis with similar  
292 effect sizes.

#### 293 294 Ethics statement

295 All animal protocols and procedures were approved by the University of Pittsburgh's Institutional Animal Care  
296 and Use Committee (IACUC) that adheres to the national guidelines established in the Animal Welfare Act and  
297 Guide for the Care and Use of Laboratory Animals as mandated by the U. S. Public Health Service Policy  
298 (PHS). The IACUC approval number for our study is 17050656 and our PHS policy number is D16-00118.

299  
300 University of Pittsburgh housed all NHP in temperature, humidity, and lighting controlled rooms. Single housed  
301 cages at least 2 square meters apart were utilized, allowing for visual and tactile contact with neighboring NHP.  
302 NHP were fed twice daily with specific formulated biscuits and at least 4 days/week with fruits and vegetables  
303 and had *a libitem* access to water. An enhanced enrichment plan was designed and administrated by NHP  
304 enrichment specialists. Species-specific behaviors were always encouraged. NHP maintained constant access  
305 to toys and other manipulata. All manipulata and toys were regularly rotated. Puzzle feeders and cardboard  
306 tubing were used to simulate foraging for food and adjustable mirrors were utilized to simulate interactions with  
307 other animals. Regular human and NHP interactions were encouraged. These interactions consisted of  
308 administering small food objects that follow all safety protocols. Caretakers interact with NHP by talking or use  
309 of non-aggressive facial expressions while performing housing area tasks. All feedings, cage cleanings, and  
310 other routine procedures were completed on a strict schedule to allow NHP to acclimate to a normal daily

311 schedule. All NHP were provided a diverse variety of visual and auditory stimulation, which included either  
312 radios or video equipment that are designed for children for at least three hours a day. These radios and video  
313 were rotated between animal rooms to avoid too much repetition for the same housed animals.

314  
315 Appetite, attitude, activity level, hydration status, etc. were documented two times daily to ensure the health of  
316 each NHP. After Mtb infection, NHP were monitored for signs of TB disease (e.g., anorexia, weight loss,  
317 tachypnea, dyspnea, coughing). Physical exams were performed on a regular basis, as well. NHP were  
318 sedated prior to any veterinary procedure using ketamine or other approved drugs. Veterinary technicians  
319 regularly document disease progression through regular PET CT imaging and closely monitor all NHP for signs  
320 of pain or distress. If any signs of pain or distress are identified appropriate supportive care (e.g. dietary  
321 supplementation, rehydration) and clinical treatments (analgesics) are given. If any NHP has advanced  
322 disease or intractable pain they are sedated with ketamine and then humanely euthanized using a lethal dose  
323 of sodium pentobarbital.

## Results

### $\alpha$ CD4 antibody results in more dramatic and sustained CD4 reduction than SIV infection

Latently infected NHP were stratified to control,  $\alpha$ CD4 depleting antibody or SIV infection groups. SIV infection was confirmed by quantitative RT-PCR of viral RNA in plasma (Figure 1A). SIV induced a transient reduction in peripheral CD4 T cells that was most dramatic 3 weeks after infection, which coincided with peak viral RNA copies (Figure 1B), as previously observed for this viral strain [11]. With the exception of this time point (3 weeks post SIV infection), CD4 and CD8 T cell frequencies and absolute counts in the blood were similar to Mtb-only control groups. The CD4 T cells in the Mtb/SIV NHP BAL were transiently lower than LTBI controls but not in the peripheral lymph nodes (pLN). CD4 depletion antibody caused a significant reduction in frequency and absolute numbers of CD4 T cells from baseline across multiple time points in blood (Figure 1B), airways (Figure 1C) and within peripheral lymph nodes (Figure 1D) as reported previously [5]. Overall, latently infected NHP undergoing CD4 depletion (Mtb/ $\alpha$ CD4 NHP) had more severe and sustained reductions in CD4 T cells in the blood and pLN compared to animals undergoing SIV infection (Mtb/SIV NHP) and LTBI control groups.

### Reactivation characteristics differ between CD4 depletion and Mtb/SIV infected animals

We previously published that both CD4 depletion [5] and SIV<sub>mac251</sub> infection [11] during LTBI resulted in reactivation rates of 50% (within 12 weeks) and 100% (50% by 8 weeks and 100% by 48 weeks after SIV), respectively. To better characterize the pathogenesis of reactivation due to these interventions without profoundly perturbing the immune response with overwhelming bacterial burden and severe pathology, subclinical reactivation was used as an endpoint. Subclinical reactivation of LTBI was defined by the appearance of a new lung granuloma by PET CT after immune suppression (representing Mtb dissemination and impaired immune control), as previously published [18]. The presence of these new granulomas observed by PET CT was confirmed by gross pathology at necropsy.

Despite a greater reduction of CD4 T cells by  $\alpha$ CD4 depletion antibody than SIV<sub>mac251</sub> (Figure 1), the strict definition for subclinical reactivation resulted in similar rates of reactivation in Mtb/SIV (4 of 8 or 50%) and Mtb/ $\alpha$ CD4 (5 of 7 or 71%) animals during the 8 weeks of treatment after LTBI (Supplemental Table 2). Because this study was powered based on each experimental group against LTBI control and not by

353 reactivation status within each group, statistical power to examine rates of reactivation between groups was  
354 limited. Among animals with reactivation, only 1 of the 5 animals in the Mtb/ $\alpha$ CD4 group had clinical signs (i.e.,  
355 increased respiratory effort) compared to all 4 of the Mtb/SIV animals with reactivation (i.e., lethargy, increased  
356 respiratory effort). All 5 of the reactivation animals in the Mtb/ $\alpha$ CD4 group and all 4 in the Mtb/SIV group had  
357 elevated ESRs (a systemic marker of inflammation), including 4 animals that also had growth of Mtb detected  
358 by gastric aspirate (GA) or BAL (2 in each group, Supplemental Table 2). At necropsy, the degree of TB-  
359 specific gross pathology (determined by necropsy score [22]) was similar between reactivators and non-  
360 reactivators receiving CD4 depletion (Figure 2A), while a trend ( $p = 0.096$ ) toward higher necropsy score was  
361 observed among reactivators of the Mtb/SIV group. Some of the scores may have been underestimated if  
362 animals were euthanized early (i.e., one Mtb/ $\alpha$ CD4 NHP suffered an unrelated aneurysm requiring early  
363 necropsy, one of the Mtb/SIV NHP developed overt PET CT signs of reactivation, and one Mtb/SIV NHP  
364 developed clinical signs of deterioration). Both reactivators and non-reactivators in the Mtb/ $\alpha$ CD4 group had  
365 similar Mtb burden in the lungs and lymph nodes (Figure 2B) with similar extrapulmonary involvement (Figure  
366 2A). In contrast, Mtb/SIV reactivated animals had greater total bacterial burden and lung burden compared to  
367 non-reactivators (Fig 2B). A greater proportion of granulomas with Mtb growth was observed among Mtb/SIV  
368 reactivators compared to non-reactivators (Figure 2C). All Mtb/SIV reactivated animals had extrapulmonary  
369 involvement (Fig. 2A). A positive correlation was observed between Mtb growth within thoracic lymph nodes  
370 and extrapulmonary involvement among Mtb/SIV NHP but not in the control or Mtb/ $\alpha$ CD4 NHP (Supplemental  
371 Figure 2). Limited bacterial killing in the lymph nodes has been previously observed during Mtb infection, with  
372 lymph node involvement positively correlated with extrapulmonary disease [23]. These data suggest that lymph  
373 nodes may be a source of bacterial dissemination [23]. Thus, despite higher CD4 T cell levels in the SIV  
374 infected groups compared to Mtb/ $\alpha$ CD4 NHP, SIV infection induced more dramatic changes in disease and  
375 bacterial burden than CD4 depletion. Furthermore, the changes that occur during early, subclinical CD4  
376 depletion induced reactivation are more subtle than SIV-induced reactivation and are not easily detected by  
377 our current gross pathology metrics (i.e., necropsy score) of TB disease at necropsy.

378 We sought to further characterize the differences in reactivation patterns between the two groups.  
379 Reactivators in the Mtb/SIV group had more new granulomas (median = 19.5 new granulomas per NHP)

380 observed by PET CT compared to the Mtb/ $\alpha$ CD4 group (median= 2 new granulomas per NHP), though it was  
381 not statistically significant given the heterogeneity that is inherent within this NHP model (Figure 3A). In 2 of the  
382 5 Mtb/ $\alpha$ CD4 NHP with reactivation, new granulomas that appeared during CD4 depletion had no viable Mtb  
383 growth (sterile) (Figure 3B). Thus, the similarity in necropsy score and bacterial burden observed between  
384 Mtb/ $\alpha$ CD4 reactivators and non-reactivators is likely attributed to the fewer number of new granulomas and a  
385 low bacterial burden per granuloma during subclinical reactivation. In contrast, Mtb/SIV co-infected reactivators  
386 had substantial dissemination of Mtb resulting in new granuloma formation during reactivation that were more  
387 permissive to Mtb growth with higher bacterial burden.

388 Using barcoded Mtb strains matched with serial PET CT scans, we are able to track the dissemination  
389 of individual bacteria when there is Mtb growth [21]. We present one such case here. One of the Mtb/SIV co-  
390 infected animals had pre-existing granulomas in the right lower lung and developed new granulomas within the  
391 right lower and right middle lobe (Supplemental Figure 3) during subclinical reactivation. At least 3 of the 7  
392 newly identified granulomas had barcodes that were also observed in the thoracic lymph nodes whereas the  
393 other new granulomas had similar barcodes detected in lung granulomas observed prior to SIV infection  
394 (Supplemental Figure 3). These data suggest that the Mtb dissemination during reactivation can occur from  
395 either the lung granulomas or thoracic lymph nodes. Interestingly, barcodes observed in extrapulmonary sites  
396 were similar to barcodes identified from lymph nodes in this animal, suggesting dissemination outside the lungs  
397 can occur from the lymph nodes.

#### 398 PET CT can predict subclinical reactivation from CD4 depletion but not Mtb/SIV co-infection

400 We assessed PET CT characteristics prior to immune suppression (SIV or  $\alpha$ CD4) for the ability to distinguish  
401 reactivation risk, including total lung FDG activity, number of granulomas, greatest size or FDG avidity of any  
402 granuloma within an animal, and number of lobes involved (Supplemental Figure 4A-B). We did not observe  
403 any significant differences in PET CT characteristics prior to immune suppression that would distinguish  
404 reactivators from non-reactivators although the sample size was limited. We previously published that PET CT  
405 patterns during LTBI could discriminate macaques at high and low risk of TNF neutralization induced  
406 reactivation [18]. Specifically, total lung FDG activity (i.e., greater than 920 cumulative-SUV) and/or the  
407 presence of an extrapulmonary site of infection observed by PET CT prior to TNF neutralization predicted

408 reactivation with 92% sensitivity and specificity [18]. By using these 2 metrics and the outcome of reactivation  
409 on animals in our current study, we could predict reactivation with 80% and 75% sensitivity and a specificity of  
410 100% and 25% among Mtb/ $\alpha$ CD4 and Mtb/SIV NHP, respectively (Supplemental Figure 4A). More specifically,  
411 the positive predictive value of high lung FDG activity and presence of extrapulmonary sites of infection was  
412 100% among Mtb/ $\alpha$ CD4 (i.e., high FDG activity and presence of extrapulmonary disease could predict  
413 reactivation 100% of the time) but only 50% of the Mtb/SIV animals. These data suggest that the spectrum of  
414 LTBI may predict reactivation risk that results from more specific immunologic impairments such as TNF  
415 neutralization or CD4 depletion. However, in the case of SIV infection where the immune suppression is  
416 broader, the threshold for reactivation to occur is less predictable.

#### 417 SIV and CD4 depletion modulate T cell composition within lung granulomas and thoracic lymph nodes

418 We quantified the T cells and assessed the quality of responses in thoracic lymph nodes and lung  
419 granulomas of both SIV and CD4 depleted animals (Figure 4, Supplemental Figure 5-9). Granulomas from  
420 Mtb/ $\alpha$ CD4 NHP had significantly lower frequencies of CD4 T cells than those from either Mtb/SIV co-infected  
421 animals or latent Mtb-only controls (Figure 4A). CD8 T cell frequencies in granulomas from control Mtb-only  
422 animals were greater than both Mtb/SIV NHP and Mtb/ $\alpha$ CD4 NHP (Figure 4A). We further examined  
423 differences in T cell frequencies between reactivators and non-reactivators in each experimental group (Figure  
424 4B). Median frequencies of CD4 T cells were lower in granulomas from reactivated NHP in both the Mtb/SIV  
425 and Mtb/ $\alpha$ CD4 groups compared to non-reactivators (Figure 4B). Interestingly, the absolute number (i.e.,  
426 based on total number of cells estimated from the granuloma) of CD4 and CD8 T cells within granulomas from  
427 Mtb/SIV NHP was significantly greater than both latent control and Mtb/ $\alpha$ CD4 animals (Figure 4C). Animals  
428 that developed reactivation in the Mtb/SIV group had greater absolute CD8 T cells though this apparently was  
429 not protective (Figure 4D). Absolute CD8 T cells were higher in Mtb/ $\alpha$ CD4 NHP reactivators compared to non-  
430 reactivators (Figure 4D). The presence of greater absolute numbers of T cells in the granulomas during  
431 Mtb/SIV co-infection suggests that SIV infection alters the cellular composition and total quantity of T cells in  
432 the granulomas, although the increased T cells did not appear to improve disease outcome. This exemplifies a  
433 unique circumstance within the granuloma in which the frequency of T cells (i.e., the proportional contribution



434 of T cells within an individual granuloma) may differ from the absolute number of T cells (i.e., the total  
435 contribution of T cells within the granuloma) between groups.

436 Similar to lung granulomas, SIV infection and  $\alpha$ CD4 antibody significantly reduced the frequency of  
437 CD4 T cells within thoracic lymph nodes compared to latent Mtb-only controls (Supplemental Figure 5A).  
438 Lower frequencies of CD4 T cells were observed in reactivators of Mtb/ $\alpha$ CD4 NHP compared to non-  
439 reactivator (Supplemental Figure 5B), as previously published [5], although this pattern was not seen in the  
440 Mtb/SIV NHP. These data suggest that SIV infection influences thoracic lymph nodes in a different manner  
441 than  $\alpha$ CD4 antibody and likely has important immunologic implications for reactivation.

#### 442 SIV and CD4 depletion change T cell cytokine production and granzyme B expression within lung granulomas

443 A homeostatic balance of pro- and anti-inflammatory responses that includes cytokine production and cytolytic  
444 function within granulomas is necessary for optimal control of Mtb [9]. To simplify the complexity of the  
445 functional immune markers data (cytolytic: granzyme B; T1/17 cytokines: TNF, IFN- $\gamma$ , IL-2, IL-17; anti-viral:  
446 IFN- $\alpha$ ; anti-inflammatory cytokines: IL-10 and IL-4) within granulomas, we used principal component analysis  
447 (PCA, Figure 5 & Supplemental Figure 6A-B). Principal component 1 (PC1) accounted for ~ 60% of the  
448 variability for CD4 T cells; PC1 was characterized as T cell immune activation that includes IFN- $\alpha$ , IFN- $\gamma$ , TNF,  
449 IL-2, IL-17, IL-10, IL-4 and granzyme B (Figure 5A and Supplemental Figure 6C). PC1 was similar for CD8 T  
450 cell responses in the granulomas, again accounting for over 60% of the variability of the data (Supplemental  
451 Figure 6D). The loading matrices for both cell types (Supplemental Figure 6A-B) show strong positive  
452 correlations of all of the cytokines with the component (ranging from 0.73 to 0.83 in CD4 cells and from 0.63 to  
453 0.88 in CD8 cells) suggesting that all functional markers (IFN- $\alpha$ , IFN- $\gamma$ , granzyme B, TNF, IL-2, IL-4, IL-10, and  
454 IL-17) are driving the component uniformly. Among CD4 T cells, the median score of PC1 (i.e., a linear  
455 combination of functional immune markers) was greater among Mtb/SIV animals (regardless of reactivation  
456 status) compared to control and Mtb/ $\alpha$ CD4 animals (Figure 5B). No difference was observed by CD4 T cells  
457 between Mtb/ $\alpha$ CD4 and control animals (Figure 5B). Similarly, SIV granulomas had a greater CD8 median  
458 PC1 score compared to both Mtb/ $\alpha$ CD4 and control groups (Figure 5B). Interestingly, the CD4 depleted groups  
459 had a higher CD8 T cell median PC1 score compared to controls. When PC1 scores were compared by  
460

461 reactivation status, greater scores were observed in granulomas from reactivated Mtb/SIV animals compared  
462 to those who did not reactivate. No difference between reactivation outcomes was observed in Mtb/ $\alpha$ CD4  
463 animals (Figure 5C). The immune parameters of PC1 in CD8 T cells also differentiated CD4 depletion induced  
464 reactivation from SIV infection. Of note, PC1 among CD4 and CD8 T cells was positively associated with Mtb  
465 burden (Figure 5D) and SIV replication (Figure 5E) within granulomas. Taken together, CD4 and CD8 T cells  
466 from Mtb/SIV granulomas have a more immune activated (more cytokines and granzyme B production) profile  
467 than Mtb/ $\alpha$ CD4 and LTBI control groups though it is not protective. This pattern also correlates with  
468 reactivation status for Mtb/SIV NHP and increases with Mtb growth and SIV replication, suggesting that the  
469 pathogens and reactivation status correlate to homeostatic change in T cell activity within lung granulomas.

470 While PCA was used as a dimensional reduction method given the complex nature of the data sets, we  
471 also performed more traditional analytic methods comparing groups by single immune functional parameters  
472 with results that were generally consistent with the PCA results (Supplemental Figure 7). Lung granulomas  
473 from Mtb/SIV NHP also contained more ( $p = 0.0528$ ) CD38<sup>+</sup> T cells compared to Mtb-only granulomas,  
474 suggesting that the Mtb/SIV co-infection is associated with increased T cell activation (Supplemental Figure 8).  
475 SIV co-infection and CD4 depletion also changed the overall composition of T cells within lung granulomas that  
476 produce these cytokines and granzyme B (Supplemental Figure 9). Surprisingly, non-traditional CD3 T cells  
477 (i.e., CD3<sup>+</sup>CD4<sup>-</sup>CD8<sup>-</sup> T cells, and CD3<sup>+</sup>CD4<sup>+</sup>CD8<sup>+</sup> T cells) actively contributed to the overall immune function  
478 of these granulomas. CD3<sup>+</sup>CD4<sup>+</sup>CD8<sup>+</sup> T cells have distinct cytokine and cytolytic responses within PBMC,  
479 BAL, and lung granulomas compared to traditional CD4 and CD8 T cells within *M. tuberculosis* infected  
480 cynomolgus macaques [27]. The responses from these non-traditional T cells suggest that SIV and CD4  
481 depletion disrupt both conventional and non-conventional T cells types within the granuloma. Overall, these  
482 data suggest that SIV co-infection causes a dysfunctional T cell homeostatic function and pro/anti-inflammatory  
483 balance that differs from CD4 depletion.

#### 484 Mtb increases SIV replication and SIV replication reduces Mtb killing within the granuloma

485 The ability of Mtb to increase HIV replication has been demonstrated *in vitro* under specific conditions  
486 [30, 31]. Plasma viremia during the course of acute infection was compared between Mtb/SIV animals and SIV  
487 only control animals. Viremia was significantly higher at 1-week post-SIV infection in the Mtb/SIV animals,  
488

489 although viremia reached a similar level in both groups by 2 weeks (Figure 6A). Overall, similar PBMC CD4  
490 and CD8 T cell frequencies and numbers were observed in Mtb/SIV and SIV-only NHP (Supplemental Figure  
491 10).

492 HIV infection has been detected in TB diseased lungs [32], lymph nodes [33], pleural fluid [34], and  
493 cerebral spinal fluid [35]. While SIV has been identified within lung and lymph nodes of Mtb/SIV co-infected  
494 NHP [11, 15], limited data exist regarding SIV or HIV infection in individual Mtb granulomas [10]. To address  
495 this, we examined the level of cell-associated SIV RNA within individually harvested granulomas from Mtb/SIV  
496 co-infected animals and found that CFU+ granulomas (measured as Mtb colony forming units, CFU) were  
497 associated with higher SIV RNA copy numbers (Figure 6B). When sorted by outcome, granulomas from  
498 animals that reactivated compared to those that did not reactivate had higher SIV RNA copies (Figure 6B),  
499 consistent with the positive correlation between SIV replication and Mtb burden in lung granulomas  
500 (Supplemental Figure 11A). To ensure that the increased SIV RNA copies per granulomas were not simply due  
501 to increased numbers of CD4 T cells in Mtb/SIV animals, we compared SIV RNA:CD4 RNA ratios  
502 (Supplemental Figure 11B). Higher RNA SIV:CD4 RNA ratios were associated with granulomas from  
503 reactivated animals compared to non-reactivators and in granulomas with Mtb burden (Supplemental Figure  
504 11B).

505 To determine whether SIV alters the ability of a host to kill Mtb *in vivo*, we compared ratios of live Mtb  
506 (CFU) to total (dead and live) bacteria (measured as chromosomal equivalents; CEQ) as an estimate of  
507 bacterial killing [19, 36]. Lung granulomas with SIV RNA contain higher CEQ than lung granulomas without SIV  
508 RNA (Figure 6C), indicating increased bacterial growth. Here, lower CFU/CEQ ratios indicate more Mtb killing  
509 whereas higher ratios indicate poor killing. Granulomas from Mtb/SIV NHP reactivators had reduced Mtb killing  
510 (higher CFU/CEQ) compared to those from non-reactivators (Figure 6D). Similarly, reduced Mtb killing was  
511 observed in granulomas with detectable SIV RNA. Taken together, these data support that there is synergy  
512 between local Mtb and SIV replication dynamics *in vivo* that coincides with increased Mtb growth, reduced Mtb  
513 killing and increased virus replication within the granuloma itself.

## 514 Discussion

515 Here, we are able to identify the early dynamics of reactivation from LTBI by focusing on the events that  
516 occur during subclinical reactivation. In this highly controlled experimental setting, both CD4 depletion and SIV  
517 infection after established LTBI induced subclinical reactivation but with different immunologic mechanisms  
518 and patterns of reactivation. It should be noted that SIV<sub>mac251</sub> preferentially infects and depletes CCR5+ CD4 T  
519 cells (especially CD45Ra- memory cells) in the periphery [37], while CD4 depletion antibody causes a broader  
520 depletion of CD4 T cells. In this study, SIV infection induced only a transient decrease (3 weeks post-SIV  
521 infection) in the total peripheral CD4 T cell frequency but otherwise was similar to control groups and no  
522 differences were noted in the absolute number of circulating CD4 T cells in blood allowing us to compare the  
523 CD4 dependent and independent mechanisms of reactivation. Notably, quantification of CD4 T cells in blood  
524 did not consistently reflect CD4 T cells in the granulomas as was the case for Mtb/SIV co-infection groups. The  
525 use of PET CT allows us to capture the earliest events of reactivation during immune suppression before  
526 overwhelming bacterial burden, disease pathologies and overt clinical signs develop. Both SIV infection and  
527 CD4 depletion during LTBI induced similar rates of subclinical reactivation, based on the strict definition of  
528 detection of a new granuloma by PET CT (and confirmed at necropsy), but the bacterial burden and severity of  
529 dissemination was worse in the Mtb/SIV group. This was attributed to the greater number of new granulomas  
530 that developed with viable Mtb growth among Mtb/SIV NHP despite having significantly more CD4 T cells than  
531 Mtb/ $\alpha$ CD4 group. Importantly, CD4 depleted animals had fewer new granulomas during early reactivation and  
532 many were sterile suggesting that CD4 independent mechanisms for Mtb killing exist within the granuloma  
533 during LTBI as others have suggested [15]. Within the granuloma, immune activation profiles were more  
534 perturbed by SIV than by CD4 depletion and the presence of SIV RNA copies was associated with greater  
535 bacterial growth and reduced bacterial killing.

536 Understanding the mechanisms of HIV-induced reactivation of LTBI is a critical question that has been  
537 the focus of NHP studies. Recently Bucsan et al. demonstrated that CD4 depletion resulted in reactivation in  
538 only 1 out of 8 latently infected rhesus macaques based on overt clinical signs in contrast to their historical  
539 data in which 9 of 17 LTBI animals developed reactivation after SIV<sub>mac239</sub> [38]. These differences in outcome  
540 may be attributed to inherent differences in the macaque models and Mtb strain used for infection. In their  
541 rhesus macaque model of Mtb infection, LTBI is established 9 weeks after inoculation with low virulence Mtb

542 CDC1551 strain [39, 40] and CD4 depleting antibody was given for up to 9 weeks. In our previous reactivation  
543 studies in our cynomolgus macaque model of LTBI using a low dose virulent strain of Mtb, 50% reactivation  
544 was observed in animals that underwent CD4 depletion [5] while 100% of animals infected with SIV<sub>mac251</sub>  
545 reactivated, although only half occurred by 8 weeks after SIV infection [11]. Our rates of subclinical reactivation  
546 defined by PET CT in our current study are consistent with our previously published data. Importantly, we were  
547 able to use subclinical reactivation (appearance of a new granuloma) as our endpoint rather than overt clinical  
548 reactivation, taking advantage of the fact that PET CT facilitates a more in-depth understanding in the  
549 pathogenesis of the earliest phases of reactivation. We were able to identify by PET CT the new granulomas  
550 that emerged during CD4 depletion and harvest them at necropsy; surprisingly, no viable Mtb could be  
551 recovered from a subset of these. This reinforces the notion that granulomas can sterilize despite having few to  
552 no CD4 T cells and highlights the complex, heterogeneous nature of granuloma function in which CD4 T cells  
553 may not be required by all granulomas to contain Mtb growth. This is consistent with our prior reactivation  
554 studies in which a subset of newly developed granulomas had no culturable Mtb during reactivation after  
555 TNF neutralization [18]. These data further characterize the early events of reactivation during LTBI.

556 The immunologic mechanisms of Mtb susceptibility among HIV-infected individuals remain unclear  
557 given the unknown timing and order of HIV or Mtb infection, highly variable nature of clinical studies, and  
558 limited access to tissue samples in humans [10]. We did not find overt PBMC immune responses that  
559 correlated with reactivation in either the Mtb/ $\alpha$ CD4 or Mtb/SIV groups. HIV/Mtb co-infection clinical studies  
560 have demonstrated that HIV preferentially induces an overall reduction in Mtb-specific IL-2 producing  
561 peripheral CD4 T cells without changes in cytomegalovirus-specific CD4 T cell responses [41], Mtb-specific  
562 Th1 producing peripheral T cells [42, 43], broad spectrum of Th transcription factors within Mtb-specific CD4 T  
563 cells [44], and PPD (purified protein derivative from Mtb)-stimulated BAL CD4 T cells producing IFN- $\gamma$  and IL-2  
564 [43]. Reductions in the frequency of CD4 and CD8 T cell production of Type 1 and IL-17 cytokines have also  
565 been observed in the blood of co-infected patients [45, 46]. In one study, 5 patients with newly acquired HIV  
566 infection and LTBI were found to have reduced frequencies of Mtb-specific CD4 T cells though none developed  
567 reactivation in the first year of seroconversion [41]. Thus, HIV directly dampens Mtb-specific T cell functions  
568 that are essential for control of Mtb infection within blood and BAL, which highlight the need for studies that  
569 examine immunologic changes within lung granulomas. These data are consistent with the increased rates of

570 TB reported during the first year of HIV seroconversion despite normal CD4 T cell counts [47]. HIV or SIV may  
571 cause Mtb-specific CD4 T cells in blood to migrate to the lungs in response to Mtb infection, but without  
572 tetramers to identify Mtb-specific T cells we cannot be certain, which is a limitation of this study. As HIV  
573 infection progresses, severe depletion of peripheral CD4 T cells correlates with increased Mtb presence within  
574 granulomas of HIV/Mtb co-infected individuals [10] and loss of interstitial CD4 T cells with an increase in Mtb  
575 growth in co-infected humanized mice [14]. It is important to understand how HIV directly affects granulomas  
576 as responses in PBMC, BAL, and granulomas are not well correlated, as observed in this study and others [11,  
577 12, 14, 15, 43].

578 Granulomas have been hypothesized to be ideal sites for HIV replication [reviewed in [10, 48-50]]. We  
579 quantified individually harvested granulomas from SIV-Mtb co-infected animals and observed more SIV RNA  
580 among reactivators, suggesting that SIV replication within granulomas is directly associated with disease  
581 status. These data are consistent with findings from others in which more SIV-infected cells within lung tissue  
582 were observed in Mtb/SIV reactivators compared to non-reactivators by immunohistochemical analysis [15],  
583 although that study did not examine individual granulomas. Similarly, more SIV DNA was obtained from lung  
584 tissue of active Mtb/SIV co-infected rhesus compared to latently infected rhesus macaques [16], indicative of  
585 more infected cells in co-infected lungs. Importantly, we show that SIV transcription was significantly higher in  
586 granulomas with live Mtb, which was associated with reduced Mtb killing. This is consistent with *in vitro* studies  
587 showing that HIV infection reduces TNF-mediated macrophage apoptosis [51, 52] and that the presence of  
588 culture filtrate protein from Mtb is associated with increased cellular HIV replication [53]. To the best of our  
589 knowledge, our data represent the largest collection of granuloma-specific quantification of Mtb and SIV RNA  
590 in the literature to date and underscore the important synergy between these two pathogens directly within the  
591 granuloma.

592 The factors that influence this synergy between Mtb and SIV have been hypothesized for years, and  
593 assessed peripherally, in airways and *in vitro*, but not in a realistic *in vivo* tissue-based setting such as lung  
594 granulomas. Although the precise mechanisms for increased SIV RNA and reduced Mtb killing in individual  
595 granulomas were not identified in this study, we hypothesize that HIV induces a combination of mechanistic  
596 immunological changes within lung granulomas that result in Mtb growth and disease progression (Figure 7).  
597 Elucidating how HIV or SIV manipulates the micro-environment of Mtb granulomas is a critical factor in

598 understanding the mechanisms of HIV-Mtb co-infection and subsequent treatment and prevention. Lung  
599 granulomas are heterogeneous with variable T cell composition, functions and Mtb growth or killing (and SIV  
600 during co-infection) within a single host [9, 12]. Within the granuloma, SIV infection significantly altered the  
601 composition of T cells and their function by increasing the overall production of both pro- and anti-inflammatory  
602 cytokines and granzyme B by CD4 and CD8 T cells. This increase in activation was associated with  
603 reactivators and correlated with Mtb growth and SIV replication. We also observed a greater frequency of  
604 activated (CD38+) T cells within granulomas from SIV-Mtb infected animals compared to LTBI control [54].  
605 Despite the increase in T cell activation and effector production in granulomas, Mtb/SIV NHP still experienced  
606 reactivation of LTBI, increased Mtb growth, and reduced ability to kill Mtb within granulomas. This suggests  
607 that the increase in activation and function of T cells may be in response to SIV-induced earlier loss of control  
608 of Mtb infection, however this response is too late to restrain Mtb. Further studies at earlier time points post-  
609 SIV infection in this model are necessary to determine the early effects of SIV on the granuloma environment.

610 Interestingly, we observed increased Type1, Type17 and IL-10 cytokine producing CD8 T cells within  
611 Mtb/SIV reactivators, which is important because IFN- $\gamma$ , TNF and IL-17 are necessary for activating  
612 macrophages to kill Mtb [55, 56]. Greater production of granzyme B (predominantly from CD8 T cells) was  
613 observed in the Mtb/SIV NHP that reactivated compared to those that did not. This is in contrast to other  
614 reports in which CD8 production of granzyme B was associated with protection from reactivation [15]. Although  
615 granzyme B is a cytolytic molecule that can induce apoptosis in infected macrophages and kill Mtb directly [57],  
616 HIV has been reported to impair degranulation of cytoplasmic granules, such as granzyme B [58]. In this study,  
617 more CD4 and CD8 T cells expressing IFN- $\alpha$  and IL-10 resided in lung granulomas from Mtb/SIV NHP that  
618 reactivated in this study. Highlighting the complexity of cytokine production within granulomas, in another  
619 study Mtb growth was correlated to IFN- $\alpha$  and IL-10 production within cervical lymph nodes with Mtb  
620 granulomas from anti-viral treatment naïve HIV/Mtb co-infected patients [59], which suggest that these  
621 cytokines might play a role in regulating Mtb growth or reflect generalized immune activation induced by SIV. A  
622 limitation of our study is that we did not examine macrophage functions within lung granulomas. We  
623 hypothesize that HIV is disrupting the interaction between macrophages and T cells within granulomas, so  
624 future studies will examine the complex macrophage environment of the granuloma in more detail.

625           Given the complex nature of the immune cells and the heterogeneous function of granulomas during  
626 Mtb infection, the optimal protective function of the granuloma is likely not dependent on a single immune  
627 mechanism or cell type but rather on a combination of possible immune interactions within the granuloma  
628 (reviewed in [60]), particularly as the increase in total T cells and increased activation of T cells within  
629 granulomas was not protective. While we focused on the role of T cells in this study, macrophages certainly  
630 play a key role in Mtb killing and in SIV infection in addition to other immune cells within the granuloma that we  
631 did not directly assess, which is an important limitation in this study. While no single cell type or immune  
632 mechanism was associated with reactivation in our studies, we hypothesize that the overall balance of both  
633 pro- and anti-inflammatory properties necessary for optimal granuloma function [9, 60] is disrupted by the  
634 complex nature of SIV infection compared to CD4 depletion alone, accounting for the more dramatic  
635 reactivation pattern in Mtb/SIV macaques. Given the heterogeneous nature of individual granulomas, any  
636 perturbation that leads to a more pro-inflammatory or more anti-inflammatory state could be permissive for  
637 both Mtb (reviewed in [61]) and SIV replication [62]. However, our data suggest that many granulomas are able  
638 to contain Mtb independent of CD4 T cells, which was also true in TNF-neutralized macaques [18]. Clearly the  
639 pleiotropic immune perturbations from SIV or HIV infection within the granuloma lower the threshold for  
640 reactivation in a multifactorial and dramatic fashion. Thus, strategies in vaccination or host-directed therapy for  
641 HIV-Mtb co-infected individuals are likely to require a multifactorial approach given the complex nature of  
642 granulomas.

643



644  
645  
646  
647  
648

**Author contributions**

CRD and PLL wrote manuscript. CRD, ZA, SF, JLF, PLL developed experiments. CRD, TR, TMB, PM, PK, AGW, HJB, FH, JB performed experiments. Statistical analysis performed by PM, CRD, PLL. All authors edited and commented on manuscript.

## 649 **Acknowledgements**

650 We thank the tireless efforts of our veterinary technicians/imaging staff (Melanie O'Malley, Jaime Tomko,  
651 Daniel Fillmore, Chelsea Causgrove, Brianne Stein, L. James Frye) and research technicians (Cassandra  
652 Ameel, Nicholas Schindler, Carolyn Bigbee, Amy Myers, Mark Rodgers, Catherine Cochran, Chris Kline).  
653 Special thanks to Charles Scanga for study coordination and members of the Flynn, Mattila, Gideon, and  
654 Scanga labs for their helpful discussion. These studies were funded by the National Institutes of Health,  
655 National Institutes of Allergy and Infectious Diseases R01 AI11871 (PLL), AI134195 (PLL), and Otis Childs  
656 Trust of the Children's Hospital of Pittsburgh Foundation (PLL). CD4 depleting antibody was produced by the  
657 NIH Non-Human Primate Reagent Resource (R24 OD010976, U24 AI126683). SIV gag/pol peptides were  
658 obtained from the NIH AIDS Reagent Program, Division AIDS, NIAID. The authors have declared that no  
659 conflict of interest exists.

660

## References:

- 661 1. Organization WH. Global Tuberculosis Report 2018: World Health Publications; 2019.
- 662
- 663 2. Lawn SD, Myer L, Edwards D, Bekker L-G, Wood R. Short-term and long-term risk of  
664 tuberculosis associated with CD4 cell recovery during antiretroviral therapy in South Africa. *AIDS*.  
665 2009;23(13):1717-25. doi: 10.1097/QAD.0b013e32832d3b6d. PubMed PMID: 19461502; PubMed Central  
666 PMCID: PMCPMC3801095.
- 667 3. Gupta RK, Lawn SD, Bekker LG, Caldwell J, Kaplan R, Wood R. Impact of human  
668 immunodeficiency virus and CD4 count on tuberculosis diagnosis: analysis of city-wide data from Cape Town,  
669 South Africa. *Int J Tuberc Lung Dis*. 2013;17(8):1014-22. doi: 10.5588/ijtld.13.0032. PubMed PMID: 23827024;  
670 PubMed Central PMCID: PMCPMC3990260.
- 671 4. Moss AR, Hahn JA, Tulsy JP, Daley CL, Small PM, Hopewell PC. Tuberculosis in the  
672 homeless - A prospective study. *Am J Resp Crit Care*. 2000;162(2):460-4. doi: DOI  
673 10.1164/ajrccm.162.2.9910055. PubMed PMID: WOS:000088829200022.
- 674 5. Lin PL, Rutledge T, Green AM, Bigbee M, Fuhrman C, Klein E, et al. CD4 T cell depletion  
675 exacerbates acute Mycobacterium tuberculosis while reactivation of latent infection is dependent on severity of  
676 tissue depletion in cynomolgus macaques. *AIDS Res Hum Retroviruses*. 2012;28(12):1693-702. doi:  
677 10.1089/AID.2012.0028. PubMed PMID: 22480184; PubMed Central PMCID: PMCPMC3505050.
- 678 6. Paige C, Bishai WR. Penitentiary or penthouse condo: the tuberculous granuloma from the  
679 microbe's point of view. *Cellular microbiology*. 2010;12(3):301-9. doi: 10.1111/j.1462-  
680 5822.2009.01424.x. PubMed PMID: 20039878.
- 681 7. Lin PL, Rodgers M, Smith L, Bigbee M, Myers A, Bigbee C, et al. Quantitative comparison of  
682 active and latent tuberculosis in the cynomolgus macaque model. *Infect Immun*. 2009;77(10):4631-42. Epub  
683 2009/07/22. doi: 10.1128/IAI.00592-09. PubMed PMID: 19620341; PubMed Central PMCID:  
684 PMCPMC2747916.
- 685 8. Capuano SV, 3rd, Croix DA, Pawar S, Zinovik A, Myers A, Lin PL, et al. Experimental  
686 Mycobacterium tuberculosis infection of cynomolgus macaques closely resembles the various manifestations  
687 of human M. tuberculosis infection. *Infect Immun*. 2003;71(10):5831-44. Epub 2003/09/23. PubMed PMID:  
688 14500505; PubMed Central PMCID: PMCPMC201048.
- 689 9. Gideon HP, Phuah J, Myers AJ, Bryson BD, Rodgers MA, Coleman MT, et al. Variability in  
690 tuberculosis granuloma T cell responses exists, but a balance of pro- and anti-inflammatory cytokines is  
691 associated with sterilization. *PLoS pathogens*. 2015;11(1):e1004603. doi: 10.1371/journal.ppat.1004603.  
692 PubMed PMID: 25611466; PubMed Central PMCID: PMCPMC4303275.
- 693 10. Diedrich CR, O'Hern J, Wilkinson RJ. HIV-1 and the Mycobacterium tuberculosis granuloma: A  
694 systematic review and meta-analysis. *Tuberculosis (Edinb)*. 2016;98:62-76. Epub 2016/05/10. doi:  
695 10.1016/j.tube.2016.02.010. PubMed PMID: 27156620.
- 696 11. Diedrich CR, Mattila JT, Klein E, Janssen C, Phuah J, Sturgeon TJ, et al. Reactivation of latent  
697 tuberculosis in cynomolgus macaques infected with SIV is associated with early peripheral T cell depletion and  
698 not virus load. *PLoS One*. 2010;5(3):e9611. doi: 10.1371/journal.pone.0009611. PubMed PMID: 20224771;  
699 PubMed Central PMCID: PMCPMC2835744.
- 700 12. Mattila JT, Diedrich CR, Lin PL, Phuah J, Flynn JL. Simian immunodeficiency virus-induced  
701 changes in T cell cytokine responses in cynomolgus macaques with latent Mycobacterium tuberculosis  
702 infection are associated with timing of reactivation. *J Immunol*. 2011;186(6):3527-37. doi:  
703 10.4049/jimmunol.1003773. PubMed PMID: 21317393; PubMed Central PMCID: PMCPMC3311978.

- 704 13. Guo M, Xian QY, Rao Y, Zhang J, Wang Y, Huang ZX, et al. SIV Infection Facilitates  
705 *Mycobacterium tuberculosis* Infection of Rhesus Macaques. *Front Microbiol.* 2016;7:2174. Epub 2017/01/31.  
706 doi: 10.3389/fmicb.2016.02174. PubMed PMID: 28133458; PubMed Central PMCID: PMC5233680.
- 707 14. Corleis B, Bucşan AN, Deruaz M, Vrbanac VD, Lisanti-Park AC, Gates SJ, et al. HIV-1 and SIV  
708 Infection Are Associated with Early Loss of Lung Interstitial CD4+ T Cells and Dissemination of Pulmonary  
709 Tuberculosis. *Cell Reports.* 2019;26(6):1409-18.e5. doi: 10.1016/j.celrep.2019.01.021.
- 710 15. Foreman TW, Mehra S, LoBato DN, Malek A, Alvarez X, Golden NA, et al. CD4 +T-cell–  
711 independent mechanisms suppress reactivation of latent tuberculosis in a macaque model of HIV coinfection.  
712 *Proc Natl Acad Sci U S A.* 2016;113(38):E5636-E44. doi: 10.1073/pnas.1611987113.
- 713 16. Kuroda MJ, Sugimoto C, Cai Y, Merino KM, Mehra S, Araínga M, et al. High Turnover of Tissue  
714 Macrophages Contributes to Tuberculosis Reactivation in Simian Immunodeficiency Virus-Infected Rhesus  
715 Macaques. *J Infect Dis.* 2018;217(12):1865-74. doi: 10.1093/infdis/jix625. PubMed PMID: 29432596; PubMed  
716 Central PMCID: PMC5972562.
- 717 17. Rodgers MA, Ameel C, Ellis-Connell AL, Balgeman AJ, Maiello P, Barry GL, et al. Preexisting  
718 Simian Immunodeficiency Virus Infection Increases Susceptibility to Tuberculosis in Mauritian Cynomolgus  
719 Macaques. *Infect Immun.* 2018;86(12). Epub 2018/09/19. doi: 10.1128/IAI.00565-18. PubMed PMID:  
720 30224552; PubMed Central PMCID: PMC6246917.
- 721 18. Lin PL, Maiello P, Gideon HP, Coleman MT, Cadena AM, Rodgers MA, et al. PET CT Identifies  
722 Reactivation Risk in Cynomolgus Macaques with Latent *M. tuberculosis*. *PLoS pathogens.*  
723 2016;12(7):e1005739. doi: 10.1371/journal.ppat.1005739. PubMed PMID: 27379816; PubMed Central PMCID:  
724 PMC4933353.
- 725 19. Lin PL, Ford CB, Coleman MT, Myers AJ, Gawande R, Ioerger T, et al. Sterilization of  
726 granulomas is common in active and latent tuberculosis despite within-host variability in bacterial killing. *Nat*  
727 *Med.* 2014;20(1):75-9. doi: 10.1038/nm.3412. PubMed PMID: 24336248; PubMed Central PMCID:  
728 PMC3947310.
- 729 20. Esmail H, Lai RP, Lesosky M, Wilkinson KA, Graham CM, Coussens AK, et al. Characterization  
730 of progressive HIV-associated tuberculosis using 2-deoxy-2-[(18)F]fluoro-D-glucose positron emission and  
731 computed tomography. *Nat Med.* 2016;22(10):1090-3. Epub 2016/09/07. doi: 10.1038/nm.4161. PubMed  
732 PMID: 27595321; PubMed Central PMCID: PMC5055809.
- 733 21. Martin CJ, Cadena AM, Leung VW, Lin PL, Maiello P, Hicks N, et al. Digitally Barcoding  
734 *Mycobacterium tuberculosis* Reveals In Vivo Infection Dynamics in the Macaque Model of Tuberculosis. *mBio.*  
735 2017;8(3):e00312-17. doi: 10.1128/mBio.00312-17. PubMed PMID: 28487426; PubMed Central PMCID:  
736 PMC5424202.
- 737 22. Maiello P, DiFazio RM, Cadena AM, Rodgers MA, Lin PL, Scanga CA, et al. Rhesus Macaques  
738 Are More Susceptible to Progressive Tuberculosis than Cynomolgus Macaques: a Quantitative Comparison.  
739 *Infect Immun.* 2018;86(2). Epub 2017/09/28. doi: 10.1128/IAI.00505-17. PubMed PMID: 28947646; PubMed  
740 Central PMCID: PMC5778369.
- 741 23. Ganchua SKC, Cadena AM, Maiello P, Gideon HP, Myers AJ, Junecko BF, et al. Lymph nodes  
742 are sites of prolonged bacterial persistence during *Mycobacterium tuberculosis* infection in macaques. *PLoS*  
743 *Pathog.* 2018;14(11):e1007337. Epub 2018/11/02. doi: 10.1371/journal.ppat.1007337. PubMed PMID:  
744 30383808; PubMed Central PMCID: PMC6211753.
- 745 24. Lin PL, Coleman T, Carney JP, Lopresti BJ, Tomko J, Fillmore D, et al. Radiologic Responses  
746 in Cynomolgus Macaques for Assessing Tuberculosis Chemotherapy Regimens. *Antimicrob Agents*  
747 *Chemother.* 2013;57(9):4237-44. Epub 2013/06/26. doi: 10.1128/AAC.00277-13. PubMed PMID: 23796926;  
748 PubMed Central PMCID: PMC3754323.

- 749 25. White AG, Maiello P, Coleman MT, Tomko JA, Frye LJ, Scanga CA, et al. Analysis of 18FDG  
750 PET/CT Imaging as a Tool for Studying Mycobacterium tuberculosis Infection and Treatment in Non-human  
751 Primates. *J Vis Exp*. 2017;(127). Epub 2017/09/21. doi: 10.3791/56375. PubMed PMID: 28930979; PubMed  
752 Central PMCID: PMC5752181.
- 753 26. Coleman MT, Chen RY, Lee M, Lin PL, Dodd LE, Maiello P, et al. PET/CT imaging reveals a  
754 therapeutic response to oxazolidinones in macaques and humans with tuberculosis. *Sci Transl Med*.  
755 2014;6(265):265ra167. Epub 2014/12/05. doi: 10.1126/scitranslmed.3009500. PubMed PMID: 25473035.
- 756 27. Diedrich CR, Gideon HP, Rutledge T, Baranowski TM, Maiello P, Myers AJ, et al. CD4CD8  
757 Double Positive T cell responses during Mycobacterium tuberculosis infection in cynomolgus macaques. *J Med*  
758 *Primatol*. 2019;48(2):82-9. Epub 2019/02/07. doi: 10.1111/jmp.12399. PubMed PMID: 30723927.
- 759 28. Melody K, McBeth S, Kline C, Kashuba AD, Mellors JW, Ambrose Z. Low Frequency of Drug-  
760 Resistant Variants Selected by Long-Acting Rilpivirine in Macaques Infected with Simian Immunodeficiency  
761 Virus Containing HIV-1 Reverse Transcriptase. *Antimicrob Agents Chemother*. 2015;59(12):7762-70. Epub  
762 2015/10/07. doi: 10.1128/AAC.01937-15. PubMed PMID: 26438501; PubMed Central PMCID:  
763 PMC4649225.
- 764 29. Roederer M, Nozzi JL, Nason MC. SPICE: exploration and analysis of post-cytometric complex  
765 multivariate datasets. *Cytometry A*. 2011;79(2):167-74. Epub 2011/01/26. doi: 10.1002/cyto.a.21015. PubMed  
766 PMID: 21265010; PubMed Central PMCID: PMC3072288.
- 767 30. Larson EC, Novis CL, Martins LJ, Macedo AB, Kimball KE, Bosque A, et al. Mycobacterium  
768 tuberculosis reactivates latent HIV-1 in T cells in vitro. *PLoS One*. 2017;12(9):e0185162. doi:  
769 10.1371/journal.pone.0185162. PubMed PMID: 28949981; PubMed Central PMCID: PMC5614573.
- 770 31. Pathak S, Wentzel-Larsen T, Asjo B. Effects of in vitro HIV-1 infection on mycobacterial growth  
771 in peripheral blood monocyte-derived macrophages. *Infect Immun*. 2010;78(9):4022-32. Epub 2010/07/14. doi:  
772 10.1128/IAI.00106-10. PubMed PMID: 20624908; PubMed Central PMCID: PMC2937445.
- 773 32. Hoshino Y, Nakata K, Hoshino S, Honda Y, Tse DB, Shioda T, et al. Maximal HIV-1 replication  
774 in alveolar macrophages during tuberculosis requires both lymphocyte contact and cytokines. *J Exp Med*.  
775 2002;195(4):495-505. doi: 10.1084/jem.20011614. PubMed PMID: 11854362; PubMed Central PMCID:  
776 PMC2193627.
- 777 33. van der Ende ME, Schutten M, Raschdorff B, Grossschupff G, Racz P, Osterhaus AD, et al.  
778 CD4 T cells remain the major source of HIV-1 during end stage disease. *AIDS*. 1999;13(9):1015-9. Epub  
779 1999/07/09. PubMed PMID: 10397529.
- 780 34. Lawn SD, Pisell TL, Hirsch CS, Wu M, Butera ST, Toossi Z. Anatomically compartmentalized  
781 human immunodeficiency virus replication in HLA-DR+ cells and CD14+ macrophages at the site of pleural  
782 tuberculosis coinfection. *J Infect Dis*. 2001;184(9):1127-33. Epub 2001/10/13. doi: 10.1086/323649. PubMed  
783 PMID: 11598835.
- 784 35. Danaviah S, Sacks JA, Kumar KP, Taylor LM, Fallows DA, Naicker T, et al. Immunohistological  
785 characterization of spinal TB granulomas from HIV-negative and -positive patients. *Tuberculosis (Edinb)*.  
786 2013;93(4):432-41. Epub 2013/04/02. doi: 10.1016/j.tube.2013.02.009. PubMed PMID: 23541388; PubMed  
787 Central PMCID: PMC3681883.
- 788 36. Munoz-Elias EJ, Timm J, Botha T, Chan WT, Gomez JE, McKinney JD. Replication dynamics of  
789 Mycobacterium tuberculosis in chronically infected mice. *Infect Immun*. 2005;73(1):546-51. Epub 2004/12/25.  
790 doi: 10.1128/IAI.73.1.546-551.2005. PubMed PMID: 15618194; PubMed Central PMCID: PMC538940.
- 791 37. Veazey RS, Mansfield KG, Tham IC, Carville AC, Shvetz DE, Forand AE, et al. Dynamics of  
792 CCR5 expression by CD4(+) T cells in lymphoid tissues during simian immunodeficiency virus infection. *J*

- 793 Virol. 2000;74(23):11001-7. Epub 2000/11/09. doi: 10.1128/jvi.74.23.11001-11007.2000. PubMed PMID:  
794 11069995; PubMed Central PMCID: PMCPMC113180.
- 795 38. Bucsan AN, Chatterjee A, Singh DK, Foreman TW, Lee TH, Threton B, et al. Mechanisms of  
796 reactivation of latent tuberculosis infection due to SIV co-infection. J Clin Invest. 2019. Epub 2019/09/04. doi:  
797 10.1172/JCI125810. PubMed PMID: 31479428.
- 798 39. Bishai WR, Dannenberg AM, Jr., Parrish N, Ruiz R, Chen P, Zook BC, et al. Virulence of  
799 Mycobacterium tuberculosis CDC1551 and H37Rv in rabbits evaluated by Lurie's pulmonary tubercle count  
800 method. Infect Immun. 1999;67(9):4931-4. Epub 1999/08/24. PubMed PMID: 10456953; PubMed Central  
801 PMCID: PMCPMC96831.
- 802 40. Cadena AM, Klein EC, White AG, Tomko JA, Chedrick CL, Reed DS, et al. Very Low Doses of  
803 Mycobacterium tuberculosis Yield Diverse Host Outcomes in Common Marmosets (*Callithrix jacchus*). Comp  
804 Med. 2016;66(5):412-9. Epub 2016/10/26. PubMed PMID: 27780009; PubMed Central PMCID:  
805 PMCPMC5073067.
- 806 41. Geldmacher C, Ngwenyama N, Schuetz A, Petrovas C, Reither K, Heeregrave EJ, et al.  
807 Preferential infection and depletion of Mycobacterium tuberculosis-specific CD4 T cells after HIV-1 infection. J  
808 Exp Med. 2010;207(13):2869-81. Epub 2010/12/01. doi: 10.1084/jem.20100090. PubMed PMID: 21115690;  
809 PubMed Central PMCID: PMCPMC3005236.
- 810 42. Geldmacher C, Schuetz A, Ngwenyama N, Casazza JP, Sanga E, Saathoff E, et al. Early  
811 depletion of Mycobacterium tuberculosis-specific T helper 1 cell responses after HIV-1 infection. J Infect Dis.  
812 2008;198(11):1590-8. Epub 2008/11/13. doi: 10.1086/593017. PubMed PMID: 19000013; PubMed Central  
813 PMCID: PMCPMC2650495.
- 814 43. Bunjun R, Riou C, Soares AP, Thawer N, Muller TL, Kiravu A, et al. Effect of HIV on the  
815 Frequency and Number of Mycobacterium tuberculosis-Specific CD4+ T Cells in Blood and Airways During  
816 Latent M. tuberculosis Infection. J Infect Dis. 2017;216(12):1550-60. Epub 2017/10/14. doi:  
817 10.1093/infdis/jix529. PubMed PMID: 29029171; PubMed Central PMCID: PMCPMC5815627.
- 818 44. Riou C, Strickland N, Soares AP, Corleis B, Kwon DS, Wherry EJ, et al. HIV Skews the  
819 Lineage-Defining Transcriptional Profile of Mycobacterium tuberculosis-Specific CD4+ T Cells. J Immunol.  
820 2016;196(7):3006-18. Epub 2016/03/02. doi: 10.4049/jimmunol.1502094. PubMed PMID: 26927799; PubMed  
821 Central PMCID: PMCPMC4799776.
- 822 45. Murray LW, Satti I, Meyerowitz J, Jones M, Willberg CB, Ussher JE, et al. Human  
823 Immunodeficiency Virus Infection Impairs Th1 and Th17 Mycobacterium tuberculosis-Specific T-Cell  
824 Responses. J Infect Dis. 2018;217(11):1782-92. doi: 10.1093/infdis/jiy052. PubMed PMID: 29546381.
- 825 46. Clark S, Page E, Ford T, Metcalf R, Pozniak A, Nelson M, et al. Reduced T(H)1/T(H)17 CD4 T-  
826 cell numbers are associated with impaired purified protein derivative-specific cytokine responses in patients  
827 with HIV-1 infection. J Allergy Clin Immunol. 2011;128(4):838-46 e5. Epub 2011/07/13. doi:  
828 10.1016/j.jaci.2011.05.025. PubMed PMID: 21745684.
- 829 47. Sonnenberg P, Glynn JR, Fielding K, Murray J, Godfrey-Faussett P, Shearer S. How soon after  
830 infection with HIV does the risk of tuberculosis start to increase? A retrospective cohort study in South African  
831 gold miners. J Infect Dis. 2005;191(2):150-8. Epub 2004/12/21. doi: 10.1086/426827. PubMed PMID:  
832 15609223.
- 833 48. Diedrich CR, Flynn JL. HIV-1/mycobacterium tuberculosis coinfection immunology: how does  
834 HIV-1 exacerbate tuberculosis? Infect Immun. 2011;79(4):1407-17. Epub 2011/01/20. doi: 10.1128/IAI.01126-  
835 10. PubMed PMID: 21245275; PubMed Central PMCID: PMCPMC3067569.

- 836 49. Lawn SD, Butera ST, Shinnick TM. Tuberculosis unleashed: the impact of human  
837 immunodeficiency virus infection on the host granulomatous response to Mycobacterium tuberculosis.  
838 *Microbes Infect.* 2002;4(6):635-46. Epub 2002/06/06. PubMed PMID: 12048033.
- 839 50. Kwan CK, Ernst JD. HIV and tuberculosis: a deadly human syndemic. *Clin Microbiol Rev.*  
840 2011;24(2):351-76. Epub 2011/04/13. doi: 10.1128/CMR.00042-10. PubMed PMID: 21482729; PubMed  
841 Central PMCID: PMC3122491.
- 842 51. Patel NR, Zhu J, Tachado SD, Zhang J, Wan Z, Saukkonen J, et al. HIV impairs TNF-alpha  
843 mediated macrophage apoptotic response to Mycobacterium tuberculosis. *J Immunol.* 2007;179(10):6973-80.  
844 Epub 2007/11/06. doi: 10.4049/jimmunol.179.10.6973. PubMed PMID: 17982088.
- 845 52. Patel NR, Swan K, Li X, Tachado SD, Koziel H. Impaired M. tuberculosis-mediated apoptosis in  
846 alveolar macrophages from HIV+ persons: potential role of IL-10 and BCL-3. *J Leukoc Biol.* 2009;86(1):53-60.  
847 Epub 2009/04/23. doi: 10.1189/jlb.0908574. PubMed PMID: 19383626; PubMed Central PMCID:  
848 PMC2704623.
- 849 53. Bernier R, Barbeau B, Olivier M, Tremblay MJ. Mycobacterium tuberculosis mannose-capped  
850 lipoarabinomannan can induce NF-kappaB-dependent activation of human immunodeficiency virus type 1 long  
851 terminal repeat in T cells. *J Gen Virol.* 1998;79 ( Pt 6):1353-61. Epub 1998/06/20. doi: 10.1099/0022-1317-79-  
852 6-1353. PubMed PMID: 9634075.
- 853 54. Wursch D, Ormsby CE, Romero-Rodriguez DP, Olvera-Garcia G, Zuniga J, Jiang W, et al.  
854 CD38 Expression in a Subset of Memory T Cells Is Independent of Cell Cycling as a Correlate of HIV Disease  
855 Progression. *Dis Markers.* 2016;2016:9510756. Epub 2016/04/12. doi: 10.1155/2016/9510756. PubMed PMID:  
856 27064238; PubMed Central PMCID: PMC4808674.
- 857 55. Ray JC, Wang J, Chan J, Kirschner DE. The timing of TNF and IFN-gamma signaling affects  
858 macrophage activation strategies during Mycobacterium tuberculosis infection. *J Theor Biol.* 2008;252(1):24-  
859 38. Epub 2008/03/07. doi: 10.1016/j.jtbi.2008.01.010. PubMed PMID: 18321531; PubMed Central PMCID:  
860 PMC2459258.
- 861 56. Tateosian NL, Pellegrini JM, Amiano NO, Rolandelli A, Casco N, Palmero DJ, et al. IL17A  
862 augments autophagy in Mycobacterium tuberculosis-infected monocytes from patients with active tuberculosis  
863 in association with the severity of the disease. *Autophagy.* 2017;13(7):1191-204. doi:  
864 10.1080/15548627.2017.1320636. PubMed PMID: 28581888; PubMed Central PMCID: PMC5529075.
- 865 57. Dotiwala F, Sen Santara S, Binker-Cosen AA, Li B, Chandrasekaran S, Lieberman J. Granzyme  
866 B Disrupts Central Metabolism and Protein Synthesis in Bacteria to Promote an Immune Cell Death Program.  
867 *Cell.* 2017;171(5):1125-37.e11. doi: 10.1016/j.cell.2017.10.004. PubMed PMID: 29107333; PubMed Central  
868 PMCID: PMC5693722.
- 869 58. Kalokhe AS, Adekambi T, Ibegbu CC, Ray SM, Day CL, Rengarajan J. Impaired degranulation  
870 and proliferative capacity of Mycobacterium tuberculosis-specific CD8+ T cells in HIV-infected individuals with  
871 latent tuberculosis. *J Infect Dis.* 2015;211(4):635-40. Epub 2014/09/11. doi: 10.1093/infdis/jiu505. PubMed  
872 PMID: 25205634; PubMed Central PMCID: PMC4351361.
- 873 59. Diedrich CR, O'Hern J, Gutierrez MG, Allie N, Papier P, Meintjes G, et al. Relationship Between  
874 HIV Coinfection, Interleukin 10 Production, and Mycobacterium tuberculosis in Human Lymph Node  
875 Granulomas. *J Infect Dis.* 2016;214(9):1309-18. Epub 2016/07/28. doi: 10.1093/infdis/jiw313. PubMed PMID:  
876 27462092; PubMed Central PMCID: PMC5079364.
- 877 60. Cadena AM, Fortune SM, Flynn JL. Heterogeneity in tuberculosis. *Nat Rev Immunol.*  
878 2017;17(11):691-702. Epub 2017/07/25. doi: 10.1038/nri.2017.69. PubMed PMID: 28736436; PubMed Central  
879 PMCID: PMC6247113.

880 61. O'Garra A, Redford PS, McNab FW, Bloom CI, Wilkinson RJ, Berry MP. The immune response  
881 in tuberculosis. *Annu Rev Immunol*. 2013;31:475-527. Epub 2013/03/23. doi: 10.1146/annurev-immunol-  
882 032712-095939. PubMed PMID: 23516984.

883 62. Ranjbar S, Boshoff HI, Mulder A, Siddiqi N, Rubin EJ, Goldfeld AE. HIV-1 replication is  
884 differentially regulated by distinct clinical strains of *Mycobacterium tuberculosis*. *PLoS One*. 2009;4(7):e6116.  
885 Epub 2009/07/02. doi: 10.1371/journal.pone.0006116. PubMed PMID: 19568431; PubMed Central PMCID:  
886 PMC2699470.  
887



888

## Figure Captions

889  
890  
891  
892  
893  
894  
895  
896  
897  
898  
899

**Figure 1. Changes in plasma viral RNA copies and T cells in peripheral blood mononuclear cells (PBMC), bronchoalveolar lavage (BAL), and peripheral lymph node (pLN) over time.** A) Plasma viral RNA copies among Mtb/SIV co-infected animals are shown. B) Peripheral CD4 T cells are more severely reduced compared to Mtb/SIV co-infected animals with latent infection. Plasma viral RNA is reported as mean and standard deviation. C) Total absolute CD4 and CD8 T cell counts and frequencies were measured in BAL cells. D) CD4 and CD8 T cell frequencies were measured in pLN. Changes in absolute CD4 and CD8 T cell counts (Abs Counts) and frequencies after SIV<sub>mac251</sub> infection (green line, Mtb/SIV, n = 8),  $\alpha$ CD4 depletion antibody (purple line, Mtb/ $\alpha$ CD4, n = 7) and controls (grey line, Mtb-only control, n = 6) are shown. Statistics reported are Steel tests comparing Mtb/SIV and Mtb/ $\alpha$ CD4 at each time point (adjusted for comparing Mtb-only controls to Mtb/SIV [green stats marker] and Mtb/ $\alpha$ CD4 to Mtb/SIV [purple stats marker]). For B-D, medians are shown with error bars representing interquartile range. \* p < 0.05, # p < 0.10.

900  
901  
902  
903  
904  
905  
906  
907  
908  
909

**Figure 2. Subclinical reactivation of Mtb/SIV NHP results in greater total thoracic burden but not in Mtb/ $\alpha$ CD4 NHP.** Non-reactivators (blue) and reactivators (red) from Mtb only (control, grey), Mtb/SIV co-infected (n = 8), and CD4 depletion (Mtb/ $\alpha$ CD4, n = 7) NHP are shown. A) Necropsy and extrapulmonary (EP) scores are based on gross pathology at time of necropsy. B) Total thoracic burden (quantitative sum of Mtb from excised tissues within the thoracic cavity) and lung and thoracic lymph nodes are shown. C) A greater percentage of granulomas with Mtb growth is observed in reactivated Mtb/SIV NHP. P-values reported from Kruskal-Wallis test with Dunn's multiple comparisons adjustments, adjusted for the following (4) comparisons: reactivators vs non-reactivators within treatments and non-reactivators and reactivators between treatments. P-values < 0.10 are shown. Each dot represents an animal. Mtb-only controls are shown for reference, but not included in the statistical analysis.

910  
911  
912  
913  
914  
915  
916

**Figure 3. SIV-induced reactivation is characterized by more new granulomas that are permissive to Mtb growth compared to CD4 depletion.** A) The number of newly formed granulomas identified by PET CT during subclinical reactivation, among Mtb/SIV (green, ranging from 13 to tntc) and Mtb/ $\alpha$ CD4 (purple, ranging from 1 to tntc) NHP. TNTC = too numerous to count and was set at 100 (Mann-Whitney, P = 0.1270). B) Mtb growth from new granulomas of Mtb/SIV and Mtb/ $\alpha$ CD4 NHP are shown. Points that fall within the grey bar were sterile. Numbers on x-axis represent individual monkey identification numbers. Lines represent medians. In A), each dot represents an individual animal; in B), each dot represents an individual granuloma.

917  
918  
919  
920  
921  
922  
923  
924  
925

**Figure 4. Frequencies of CD4 T cells are severely reduced by CD4 depletion but SIV markedly increases the total number of T cells within granulomas.** Non-reactivators (blue) and reactivators (red) from Mtb only (control, grey), Mtb/SIV co-infected, and CD4 depletion (Mtb/ $\alpha$ CD4) NHP are shown. A) and B) CD4 and CD8 T cell frequencies from lung granulomas (individual symbol) within individual monkeys (shapes) are shown. C) and D) Total number of CD4 and CD8 T cells within the granuloma are shown. Kruskal-Wallis test with Dunn's multiple comparisons adjusted p-values are shown. P-values < 0.10 are shown. Lines represent medians. (6 Mtb control, n = 46 granulomas; 8 Mtb/SIV NHP, n = 110; and 7 Mtb/ $\alpha$ CD4 NHP, n = 86; within Mtb/SIV NHP, non-reactivators = 25 granulomas, reactivators = 85; and within Mtb/ $\alpha$ CD4 non-reactivators = 20, reactivators = 66).

926  
927  
928  
929  
930  
931  
932  
933  
934  
935  
936  
937

**Figure 5. Principal component analysis demonstrates that SIV is associated with greater widespread T cells immune activation within the granuloma.** A) Biplots are shown for the first two principal components. Each dot represents a granuloma. (Purple dots = granulomas from Mtb/ $\alpha$ CD4 NHP, green dots = Mtb/SIV NHP, and grey dots = granulomas from Mtb-only control NHP. B) Median scores of of principal component 1 (includes total numbers of CD4 and CD8 T cells producing IFN- $\alpha$ , IFN- $\gamma$ , TNF, IL-2, IL-17, IL-10, IL-4 and Granzyme B are compared across treatment groups. Non-reactivators (blue) and reactivators (red) from Mtb/SIV co-infected and Mtb/ $\alpha$ CD4 NHP are shown. Individual monkeys are identified by different shapes. All treatment groups were compared using Kruskal-Wallis test with Dunn's multiple comparison adjusted p-values reported. C) Median scores of principal component were compared between non-reactivators and reactivators within each treatment group. (Kruskal-Wallis Test with Dunn's multiple comparison adjusted p-values reported.) D) The relationship between the CFU per granuloma (log<sub>10</sub>) and the first principal component was tested using Spearman's  $\rho$  for all treatment groups. E) In Mtb/SIV NHP, the relationship between granuloma

938 viral RNA quantification and the first principal component was tested using Spearman's  $\rho$ . Each group contains  
939 the following number of granulomas: 30 Mtb-only Control, 43 Mtb/ $\alpha$ CD4, 83 Mtb/SIV.

940 **Figure 6. SIV replication within the granuloma is associated with reactivation status, greater bacterial**  
941 **burden and growth with less bacterial killing.** A) Comparison between plasma SIV RNA copies/ml from  
942 SIV-only (black, n = 4) and Mtb/SIV co-infected (green, n = 8) NHP. Symbols represent means and error bars  
943 represent standard deviations. B) Differences in SIV RNA replication within lung granulomas from Mtb/SIV co-  
944 infected NHP by Mtb burden (Mtb growth [CFU+, n = 51] and sterile [CFU-, n = 27]) and outcome (reactivators  
945 [red, n = 59] and non-reactivators [blue, n = 19]). Each symbol is a granuloma. C) Bacterial growth (presented  
946 as chromosomal equivalents, CEQ) is greater within among Mtb/SIV granulomas with detectable SIV RNA  
947 (SIV-, n = 11; SIV+, n = 35). D) Within Mtb/SIV NHP granulomas, less bacterial killing (represented as  
948 CFU/CEQ ratio) is observed when SIV RNA is present (SIV-, n = 11; SIV+, n = 35) and during reactivation  
949 (reactivators [red, n = 56] and non-reactivators [blue, n = 23]). CFU was transformed by adding 1 to reflect  
950 sterile lung granulomas with CEQ. Dotted line at Y = 1 defines no killing. Two points above Y = 1 represent the  
951 higher CEQ threshold (1000) compared to CFU's lower threshold (10). Each shape represents an individual  
952 NHP. Individual t tests were utilized to determine significant differences ( $P < 0.05$ ) between SIV-only and  
953 Mtb/SIV NHP. The Mann-Whitney test was used to determine significance between groups in granulomas.  
954 Lines represent medians in B-D.

955 **Figure 7. SIV changes immunological functions within Mtb lung granulomas, increases Mtb growth,**  
956 **and reduces Mtb killing.** A) An example Mtb caseous granuloma contains T cells, macrophages, neutrophils,  
957 and Mtb. B) Mtb/SIV co-infected granulomas contain more CD8 T cells and an increase in overall production of  
958 Th1 cytokines, granzyme B, IL-17, IL-10, IL-4, and IFN- $\alpha$  by CD4 and CD8 T cells. SIV also increases the  
959 probability of causing new granulomas to form, Mtb growth and dissemination. SIV has been linked to  
960 increases in Mtb growth and a reduction in Mtb killing during reactivated disease, while Mtb growth correlates  
961 to increases in SIV replication. This suggests that lung granulomas are sites that support a synergistic  
962 relationship between SIV replication and Mtb growth. Image created by BioRender.com.

## Supplemental Data Captions

### Supplemental Table 1. Antibodies used for intracellular cytokine staining

### Supplemental Table 2. Clinical signs and disease outcome for each nonhuman primate in study

**Supplemental Figure 1. Example gating strategy for flow cytometry.** A) Singlet events positively selected. B) Live cells negatively selected. C) Lymphocytes selected. D) CD3 T cells positively selected and CD4 and CD8 T cells selected from CD3 T cell gate. E) Example cytokine and granzyme B expressing T cells. TNF, IFN- $\gamma$ , and granzyme B are displayed. Gating example from a lung granuloma.

**Supplemental figure 2. Extrapulmonary disease (EP) and Mtb growth within thoracic lymph nodes were positively correlated within Mtb/SIV NHP.** Correlation between EP score and Lymph node Mtb growth within control, Mtb/ $\alpha$ CD4 and Mtb/SIV was compared. Spearman's test was performed and correlation coefficient ( $\rho$ ) and p values < 0.05 are presented. Each dot represents an animal. NHPs that reactivated are represented in red and non-reactivators are represented in blue.

**Supplemental Figure 3. Tracking of Mtb lesions with barcodes over time.** The panel on the left shows lung granulomas (small dots) and lymph nodes (large pie charts) that were seen prior to SIV infection on PET-CT scans. The right panel shows the barcodes from granulomas and lymph nodes seen only post-SIV infection (in color) with the barcodes identified within granulomas prior to SIV infection shown in black. Extrapulmonary barcodes are shown below the lung renderings. All extrapulmonary tissues represented here were identified only after SIV-infection at necropsy. Colors denote barcode content. Solid colors indicate a sample which contained only one barcode, while pie chart markers reflect the relative barcode content of samples which contained two or more barcodes.

**Supplemental Figure 4. PET CT characteristics prior to immune suppression do not predict reactivation in either SIV or  $\alpha$ CD4 antibody treated animals.** Each dot represents an individual animal. A) Total lung FDG activity prior to SIV infection or  $\alpha$ CD4 depletion (dotted line set at the TNF-induced predictive reactivation threshold value) is shown among reactivators (red) and non-reactivators (blue). Open circles represent animals with extrapulmonary disease evident on scan before immune suppressant. B) FDG uptake per granuloma, number of lung lobes containing granulomas, total granuloma counts, and size (in mm) of largest granuloma are compared between reactivators and non-reactivators. Kruskal-Wallis performed, all p-values > 0.10; therefore none are reported. TNTC = too numerous to count.

**Supplemental Figure 5. CD4 T cell frequencies are reduced within thoracic lymph nodes of Mtb/SIV and Mtb/ $\alpha$ CD4 NHP.** T cell frequencies and total counts from thoracic lymph nodes (individual symbols) within individual monkeys (shapes) from non-reactivators (blue) and reactivators (red) and controls (grey). A) Differences in CD4 and CD8 T cell presence within infection cohort (Mtb only, control, n = 27; Mtb/SIV, n = 40; and Mtb/ $\alpha$ CD4, n = 27) are presented. B) Differences in CD4 and CD8 T cell presence based on disease outcome (reactivator; non-reactivator) are presented. Within Mtb/SIV NHP, non-reactivators = 21 thoracic lymph nodes, reactivators = 19; and within Mtb/ $\alpha$ CD4 non-reactivators = 8, reactivators = 17. Lymph nodes with granulomas are represented by large symbols and the small symbols identify lymph nodes without granulomas. P values reported represent Kruskal-Wallis test with Dunn's adjusted p-values are show P-values < 0.10 are shown. Lines represent medians.

**Supplemental Figure 6. Results of Principal Component Analysis on CD4 and CD8 cytokine counts.** Biplots of the first two principal components on CD4 (A) and CD8 (B) counts. For both CD4 and CD8 counts, the first principal component represents over 60% of total variability of the entire sample of granulomas. The loading matrix displays the correlation of each individual cytokine with the principal component for CD4 T cells (C) and CD8 T cells (D). In CD4 counts, IFN- $\alpha$  has the strongest correlation with the component (0.83264); in CD8 counts, IFN- $\gamma$  has the strongest correlation (0.87519). Each group contain the following number of granulomas: 30 Control, 43  $\alpha$ CD4/Mtb, 83 SIV/Mtb.

**Supplemental Figure 7. SIV changes CD4 and CD8 T cell cytokine and granzyme B expression within lung granulomas compared to Mtb-only NHP** Absolute counts of cytokine production and granzyme B

011 presence within CD4 and CD8 T cells of lung granulomas from Mtb-only (grey symbols), Mtb/SIV, and  
012 Mtb/ $\alpha$ CD4 from NHP and from non-reactivated (blue) and reactivated (red) NHP. Each symbol is a lung  
013 granuloma and individual NHP are represented as different shapes. Kruskal-Wallis with Dunn's adjusted p-  
014 values are reported, accounting for the following (4) comparisons: reactivator vs non-reactivator within each  
015 group and reactivators and non-reactivators across groups (Reactivators: Mtb/SIV vs Mtb/ $\alpha$ CD4, non-  
016 reactivators: Mtb/SIV vs Mtb/ $\alpha$ CD4). P-values < 0.10 are shown. Lines represent medians. The number of  
017 granulomas within each group are as follows- Cytokine and Th1 cells (100 CD3 T cell threshold): 6 Mtb only, n  
018 = 30; 8 Mtb/SIV, n = 83; and 7 Mtb/ $\alpha$ CD4 NHP, n = 43; Mtb/SIV 4 reactivators, n = 69, 4 non-reactivators, n =  
019 14; Mtb/ $\alpha$ CD4 NHP, 5 reactivators, n = 33, 2 non-reactivators, n = 10).

020 **Supplemental Figure 8. More activated T cells are within lung granulomas of Mtb/SIV compared to Mtb-**  
021 **only NHP.** A) Immunohistochemistry images of nuclei (blue), CD38 (green), CD3 (red) images from Mtb-only  
022 and Mtb/SIV NHP lung granulomas. Arrows identify CD3+CD38+ T cells. B) CD38+CD3+ T cells were  
023 quantified from 6 Mtb/SIV (n = 13) and 6 Mtb-only (n = 11) NHPs. Reactivators are identified in red and non-  
024 reactivators in blue. Each symbol represents a granuloma and each shape represents a different NHP.  
025 Quantification was performed on regions of interest (ROI, 20x image) of lung granulomas. Mann-Whitney test  
026 was used to determine significance between groups in granulomas (p value displayed). Lines represent  
027 median.

028 **Supplemental Figure 9. Changes in T cell composition of Mtb-specific cytokines and cytolytic markers**  
029 **during SIV infection and CD4 depletion within the granuloma.** The distribution of T cells within the  
030 granuloma are represented on the left panels represented as CD4 T cells (CD4+CD8-, green), CD8 T cells  
031 (CD8+CD4-, orange), other T cells (CD4+CD8+ T cells, grey and CD4-CD8- T cells, black). The distribution of  
032 T cells making any Mtb-specific cytokines or cytolytic markers is shown to the right. Permutation tests were  
033 used to compare groups. The number of granulomas within each group are as follows- CD3 T cells: Mtb only, n  
034 = 47; Mtb/SIV, n = 110; and Mtb/ $\alpha$ CD4 NHP, n = 86. Cytokine and Th1 cells (100 CD3 T cell threshold): 6 Mtb  
035 only, n = 30; 8 Mtb/SIV, n = 83; and 7 Mtb/ $\alpha$ CD4 NHP, n = 43; Mtb/SIV 4 reactivators, n = 69, 4 non-  
036 reactivators, n = 14; Mtb/ $\alpha$ CD4 NHP, 5 reactivators, n = 33, 2 non-reactivators, n = 10).

037 **Supplemental Figure 10. Changes in peripheral blood mononuclear cells (PBMC), bronchoalveolar**  
038 **lavage (BAL), and peripheral lymph node (pLN) T cells within Mtb/SIV and SIV-only NHP.** Changes in  
039 CD4 and CD8 T cell counts (Abs Counts) and frequencies after SIV<sub>mac251</sub> infection (green line, Mtb/SIV, n = 8)  
040 or SIV-only (black line, n = 4). Statistics reported are Wilcoxon-exact tests comparing Mtb/SIV and SIV-only at  
041 each time point (not adjusted for multiple tests). Lines are median and error bars represent interquartile range.  
042 \*\*\*\* p < 0.0001, \*\*\* p < 0.001, \*\* p < 0.01, \* p < 0.05, # p < 0.10.

043 **Supplemental Figure 11. SIV replication correlates to Mtb growth and is not attributed higher levels of**  
044 **CD4 T cells alone in the granuloma.** A) A positive correlation between lung granulomas that contain both SIV  
045 replication and Mtb growth (n = 42) is observed. B) Granuloma specific ratios of SIV viral RNA (vRNA): CD4  
046 RNA is shown among SIV/Mtb animals who were non-reactivators (n = 22) and reactivators (n = 58) as well as  
047 from granulomas with Mtb growth (CFU+, n = 52) and without viable Mtb growth (CFU-, n = 28). Each symbol  
048 is a granuloma and individual NHP are represented as different shapes. Red symbols identify reactivators and  
049 blue symbols identify non-reactivators. Samples without SIV replication or Mtb growth are presented as a  
050 reference. All data was log<sub>10</sub> transformed. Pearson correlation coefficients are reported with corresponding p-  
051 values in A. The Mann-Whitney test was used to determine significance between groups in granulomas. Lines  
052 represent medians in B.

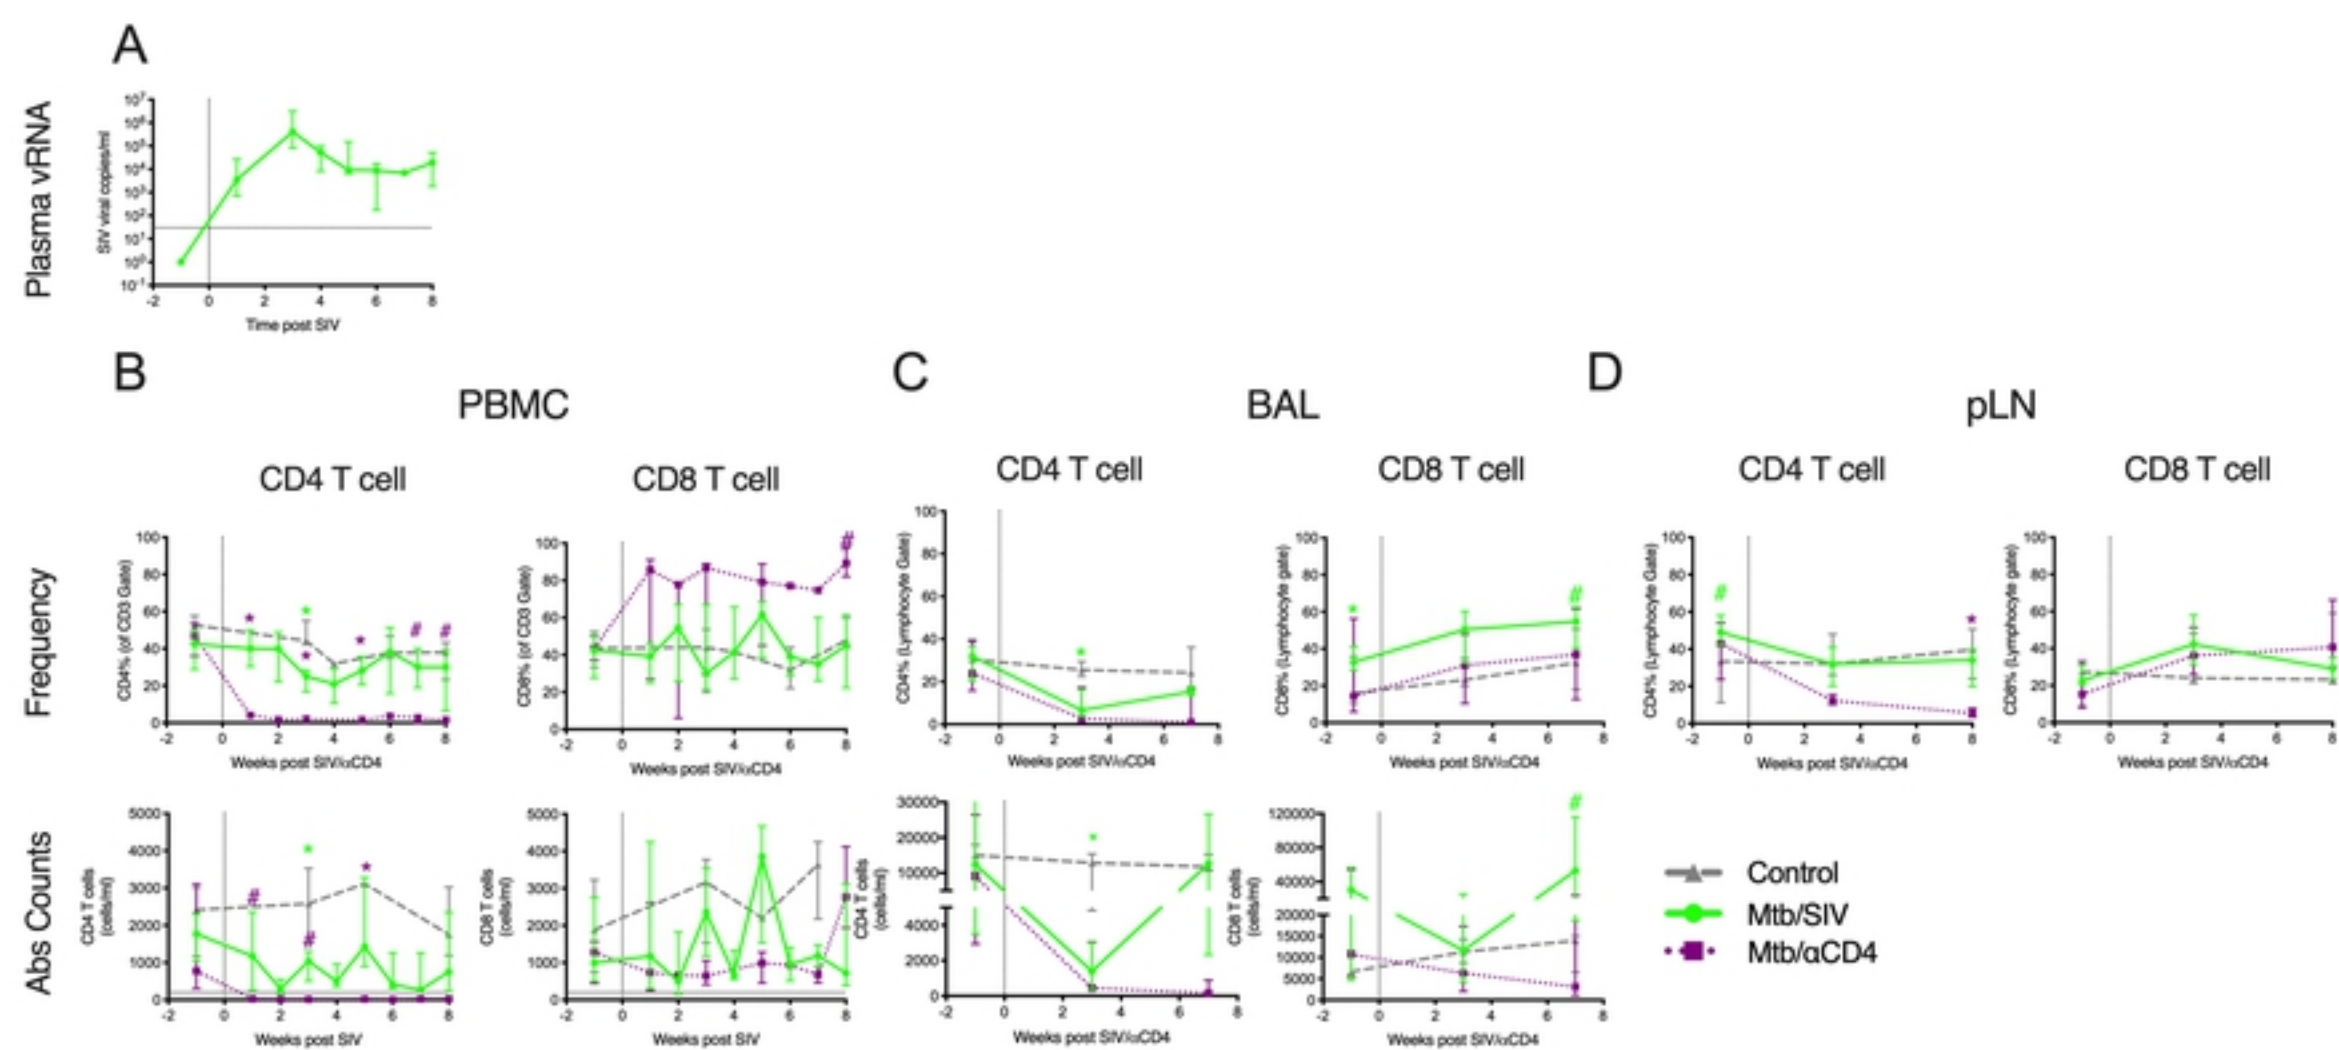

Figure 1

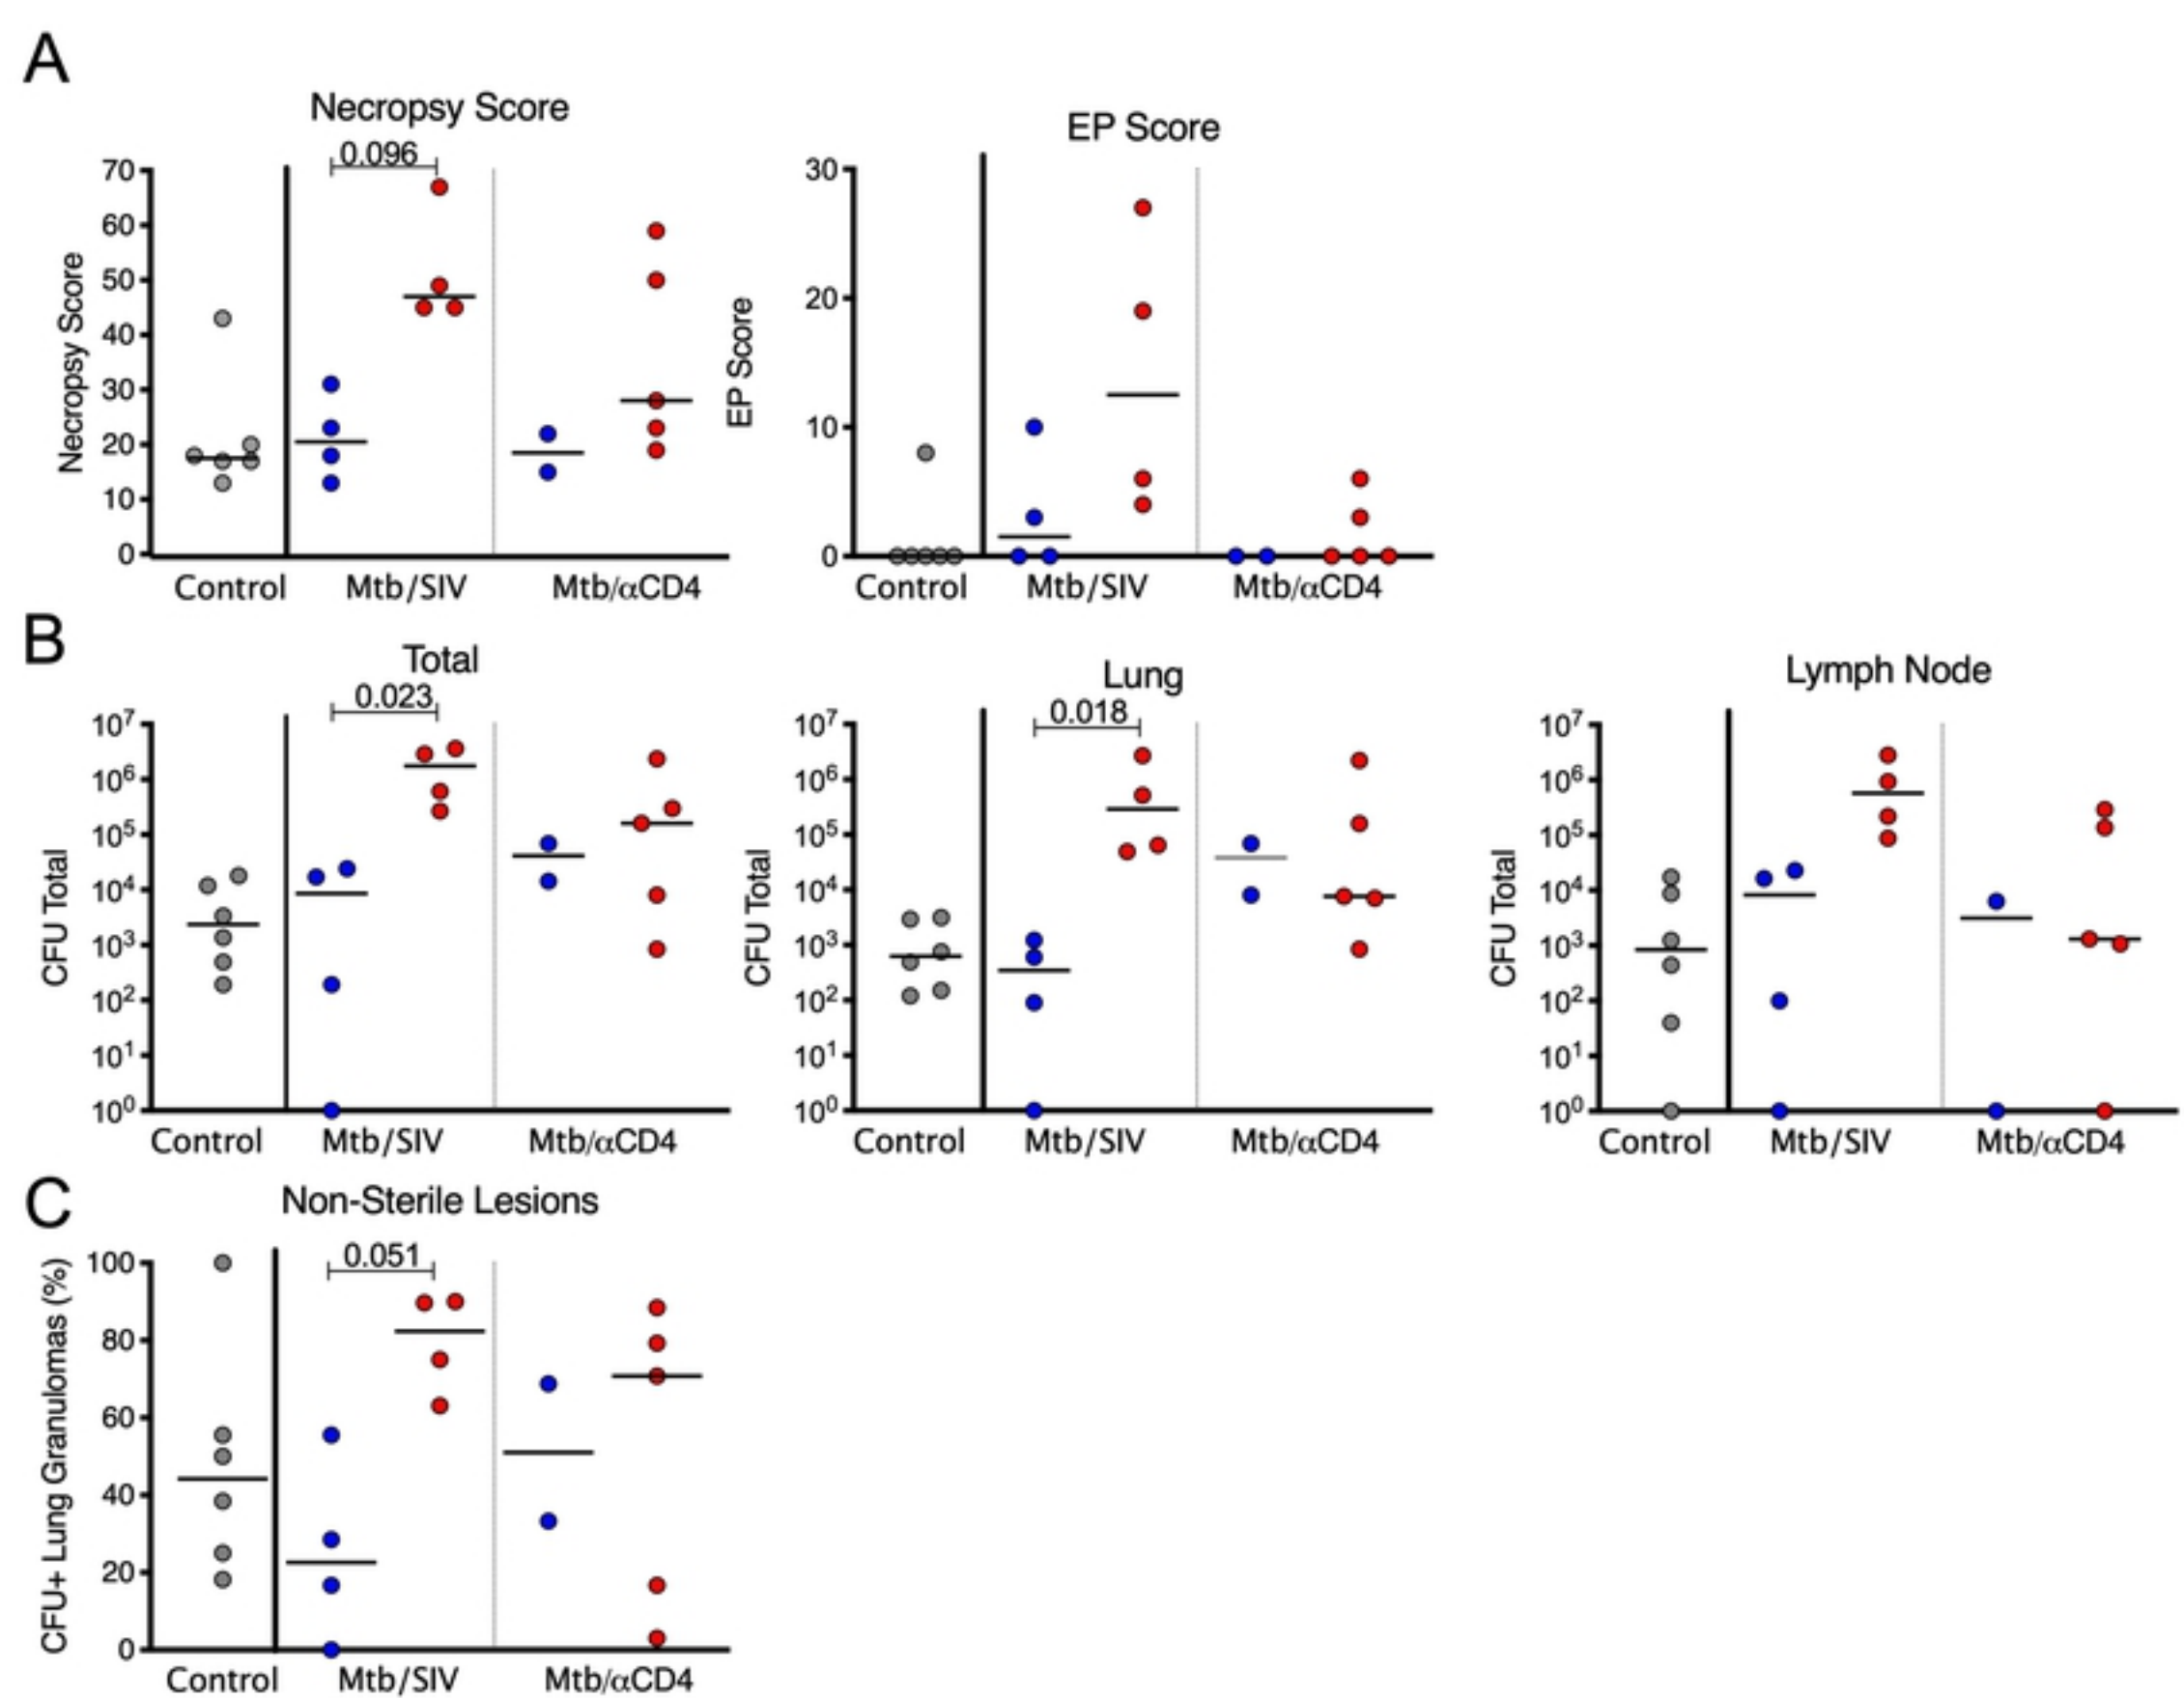

Figure 2

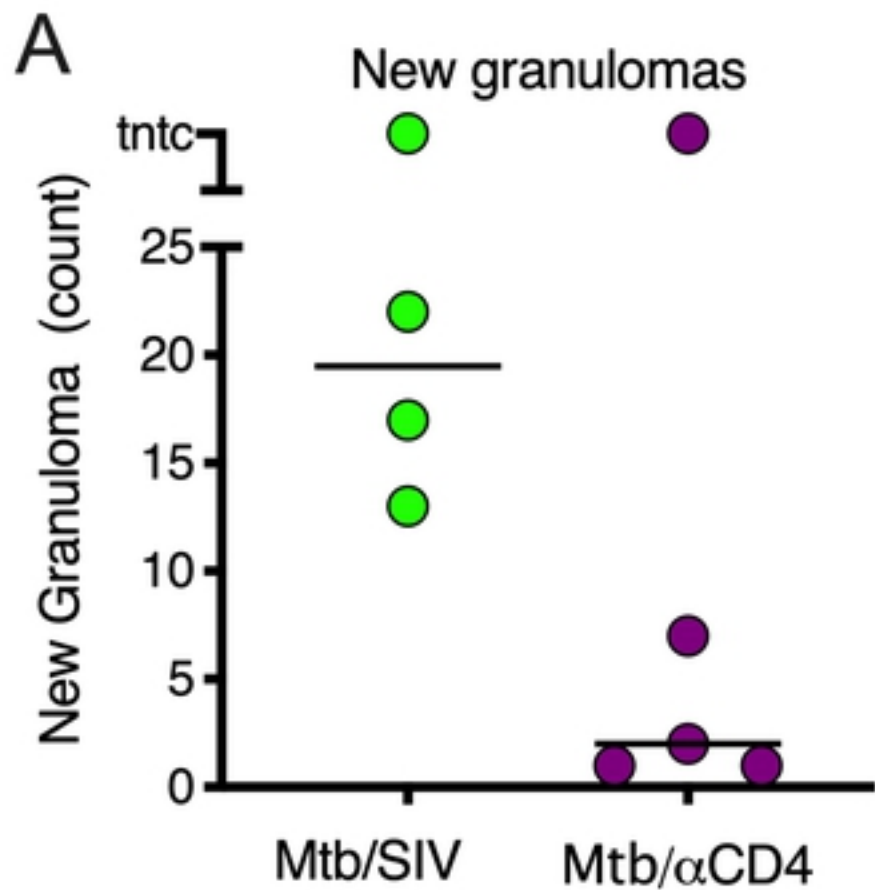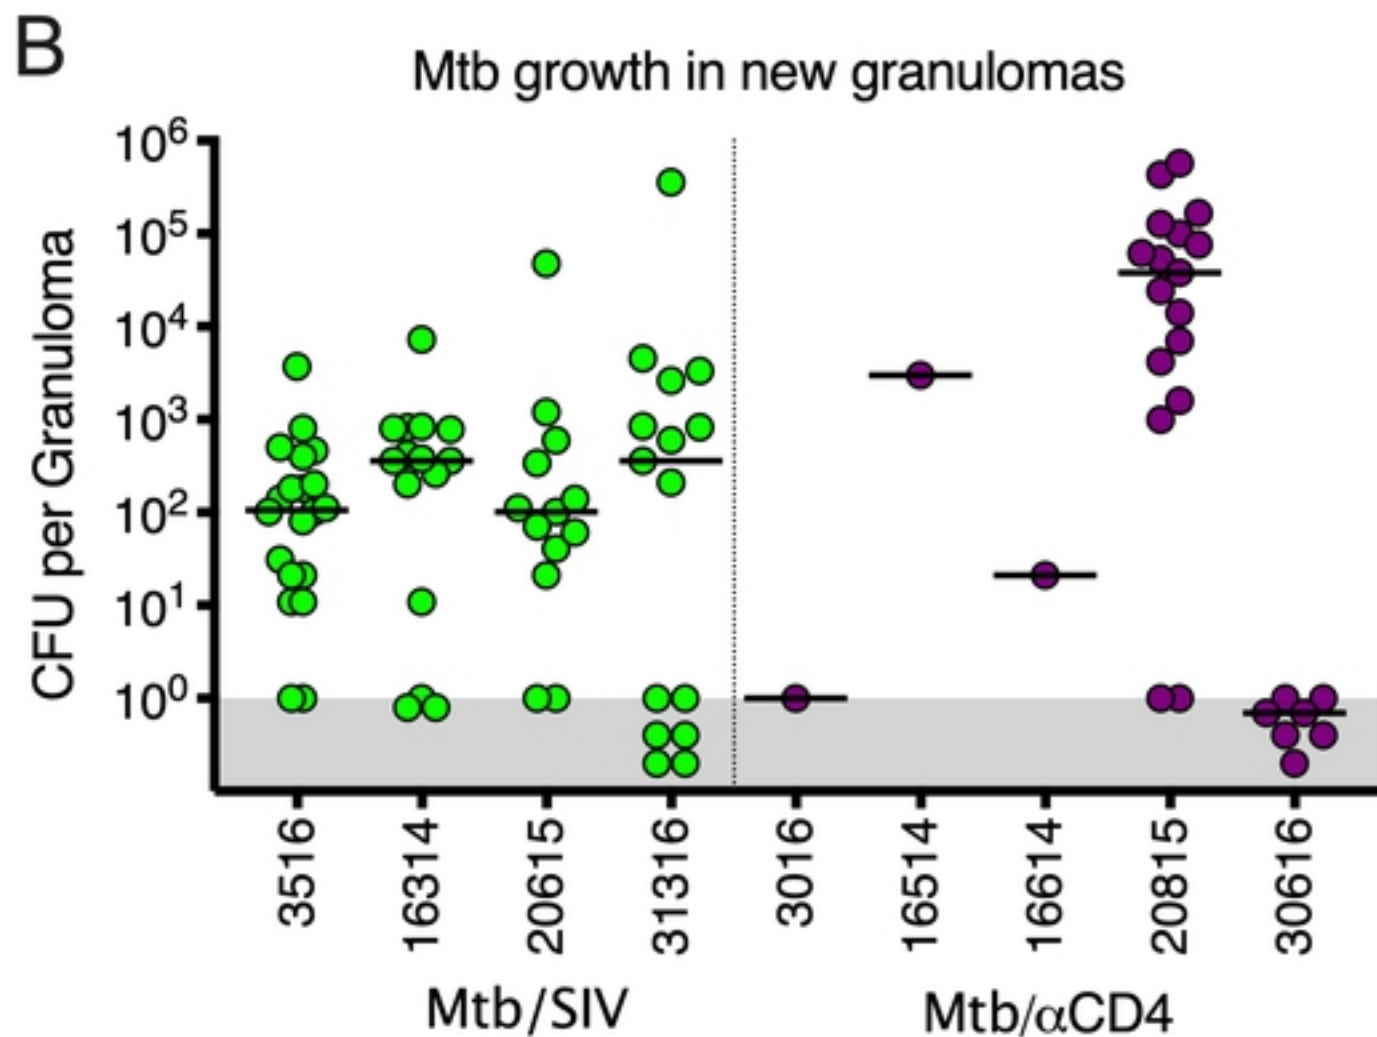

Figure 3

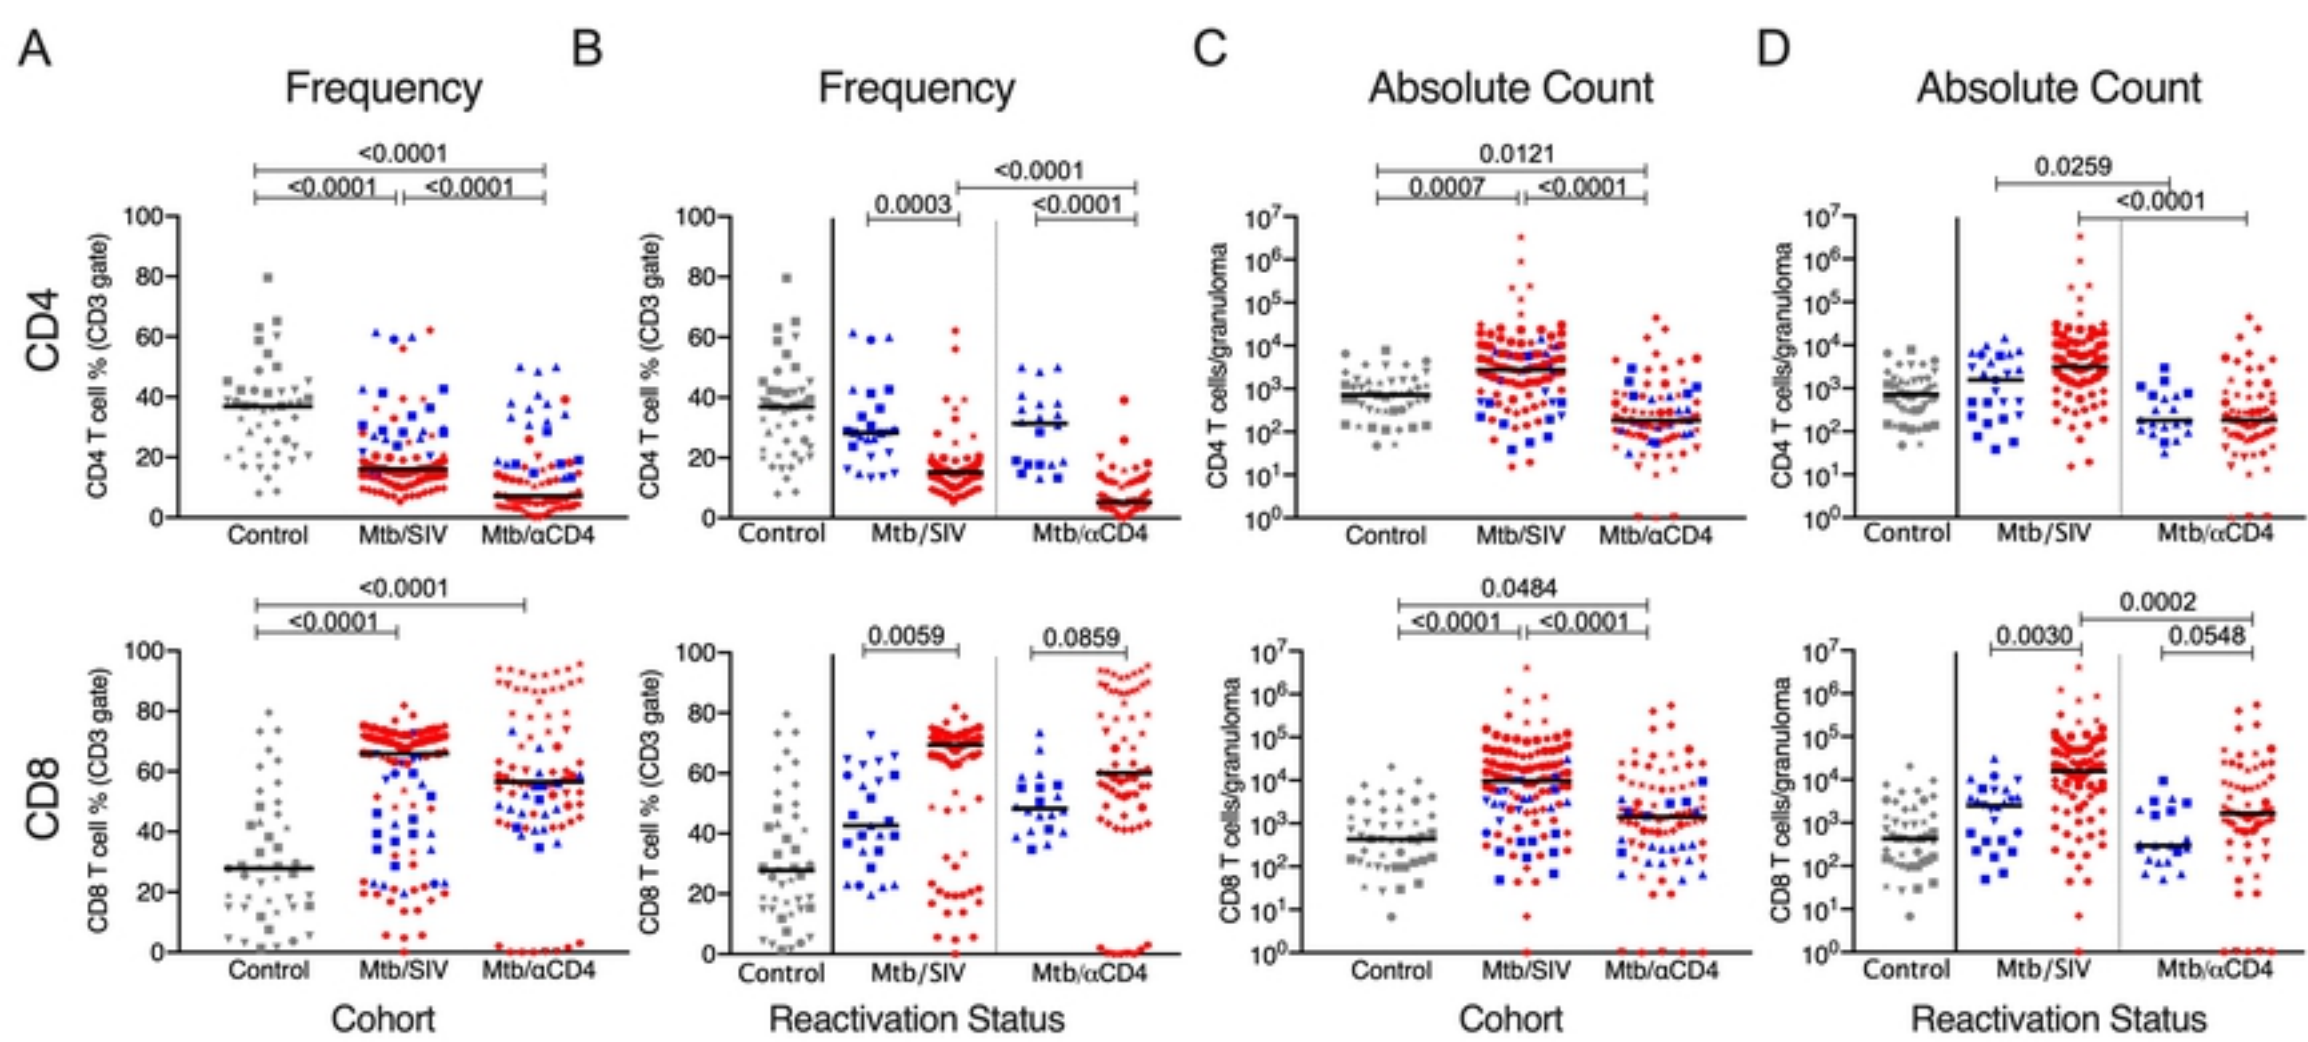

Figure 4



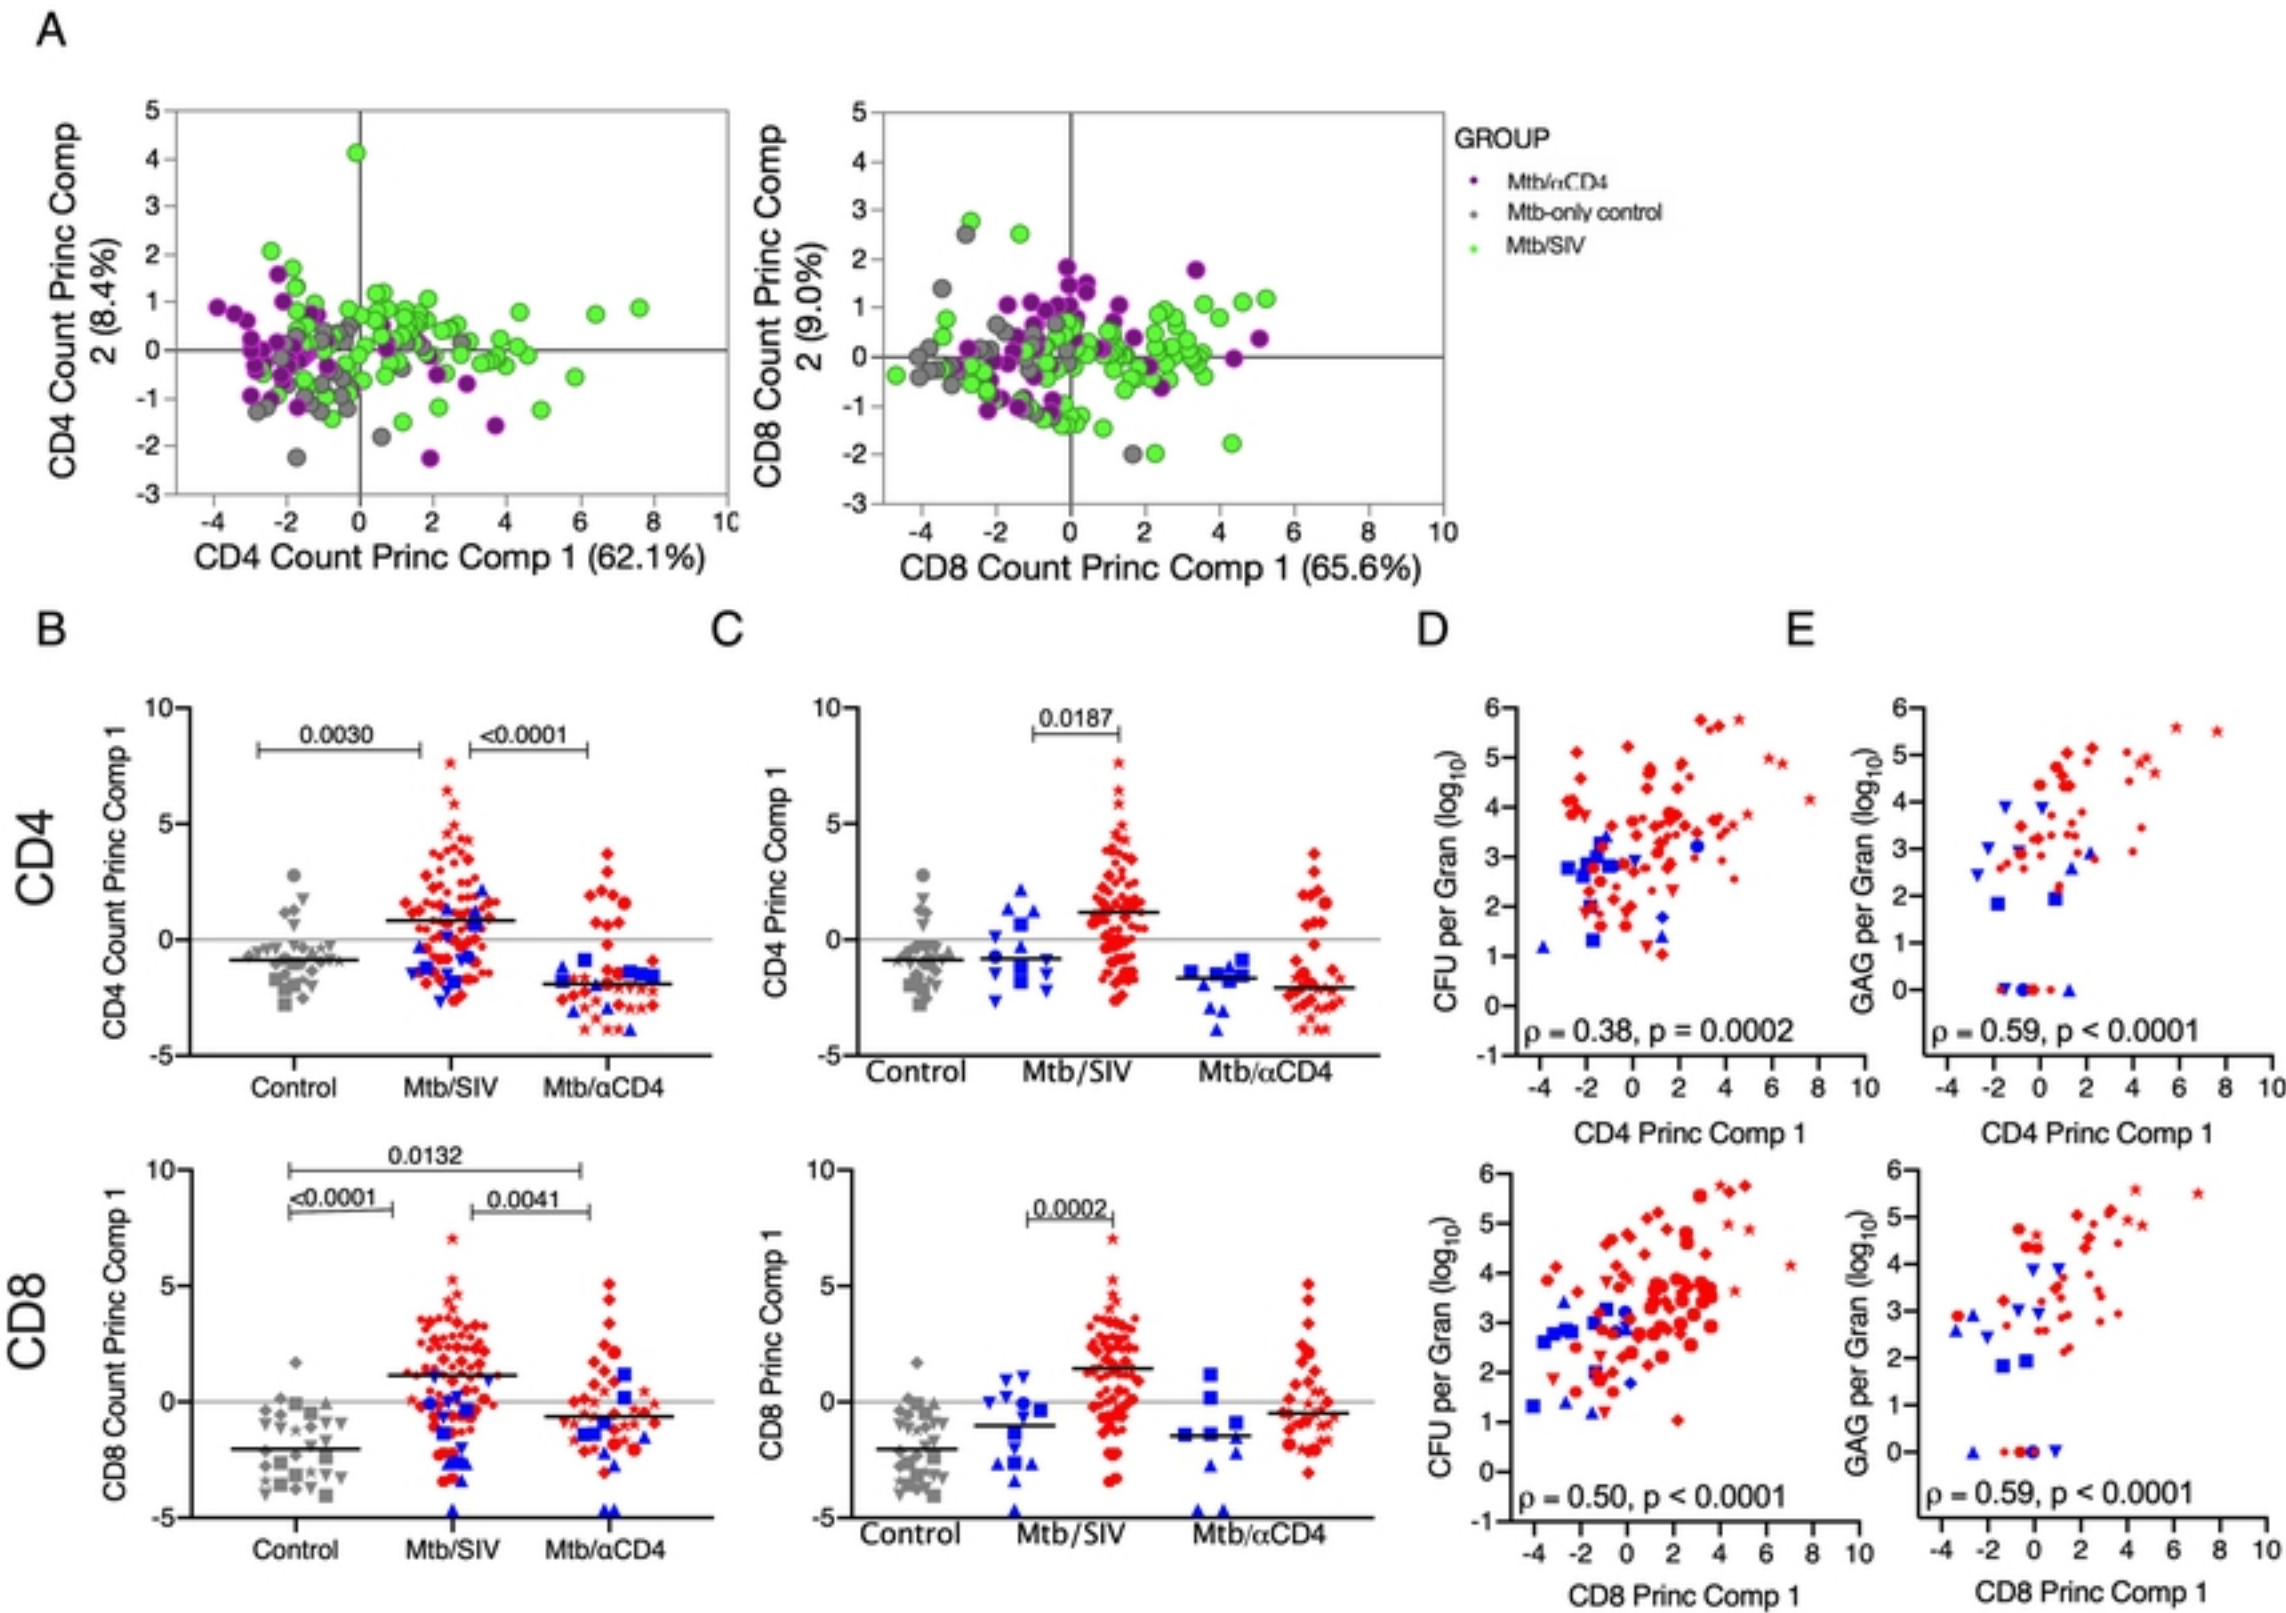

Figure 5

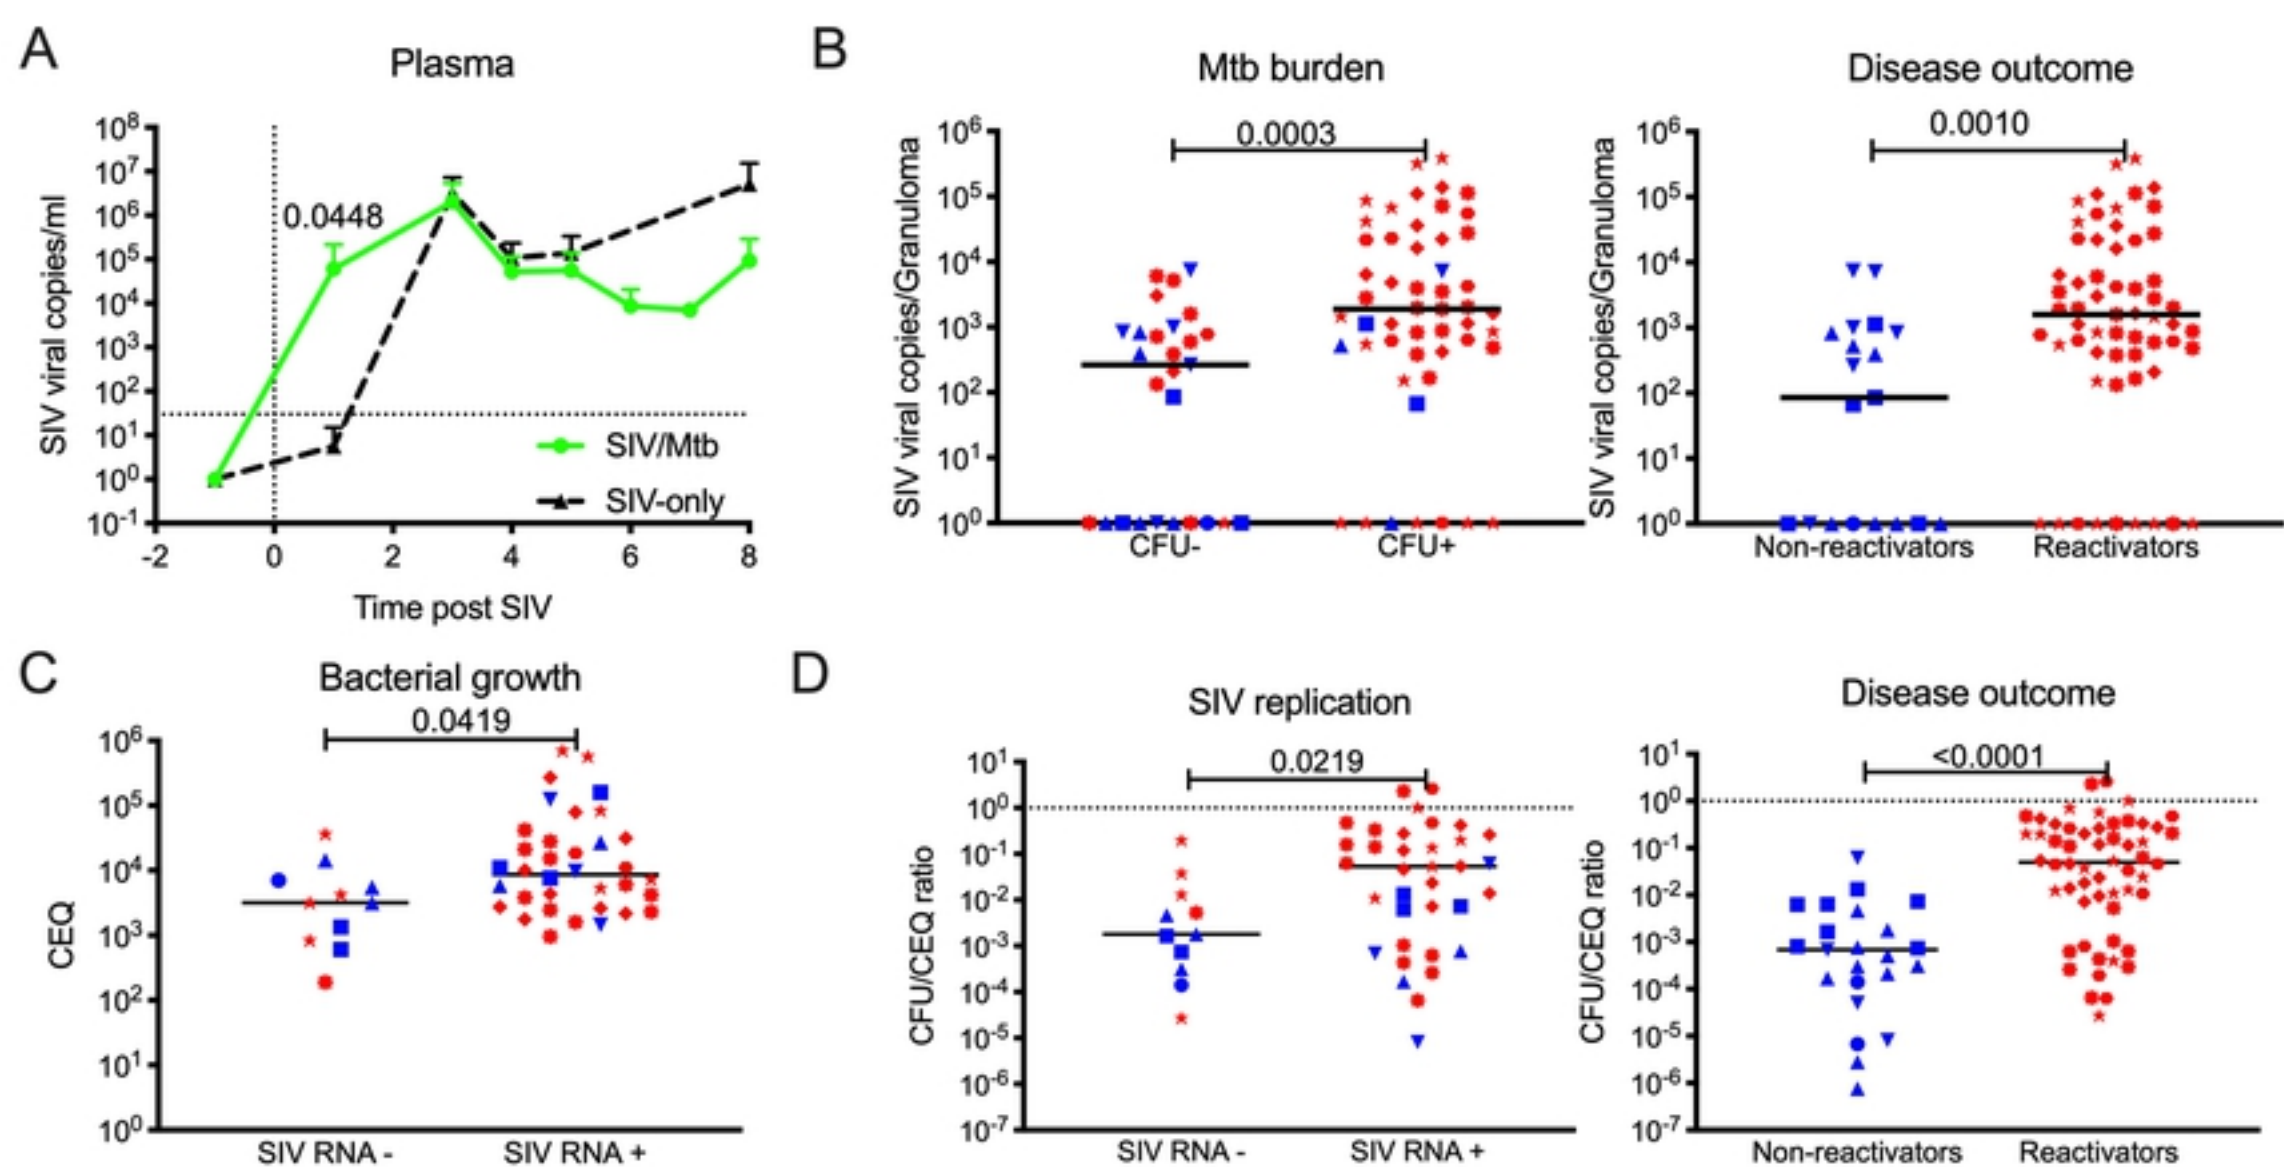

Figure 6

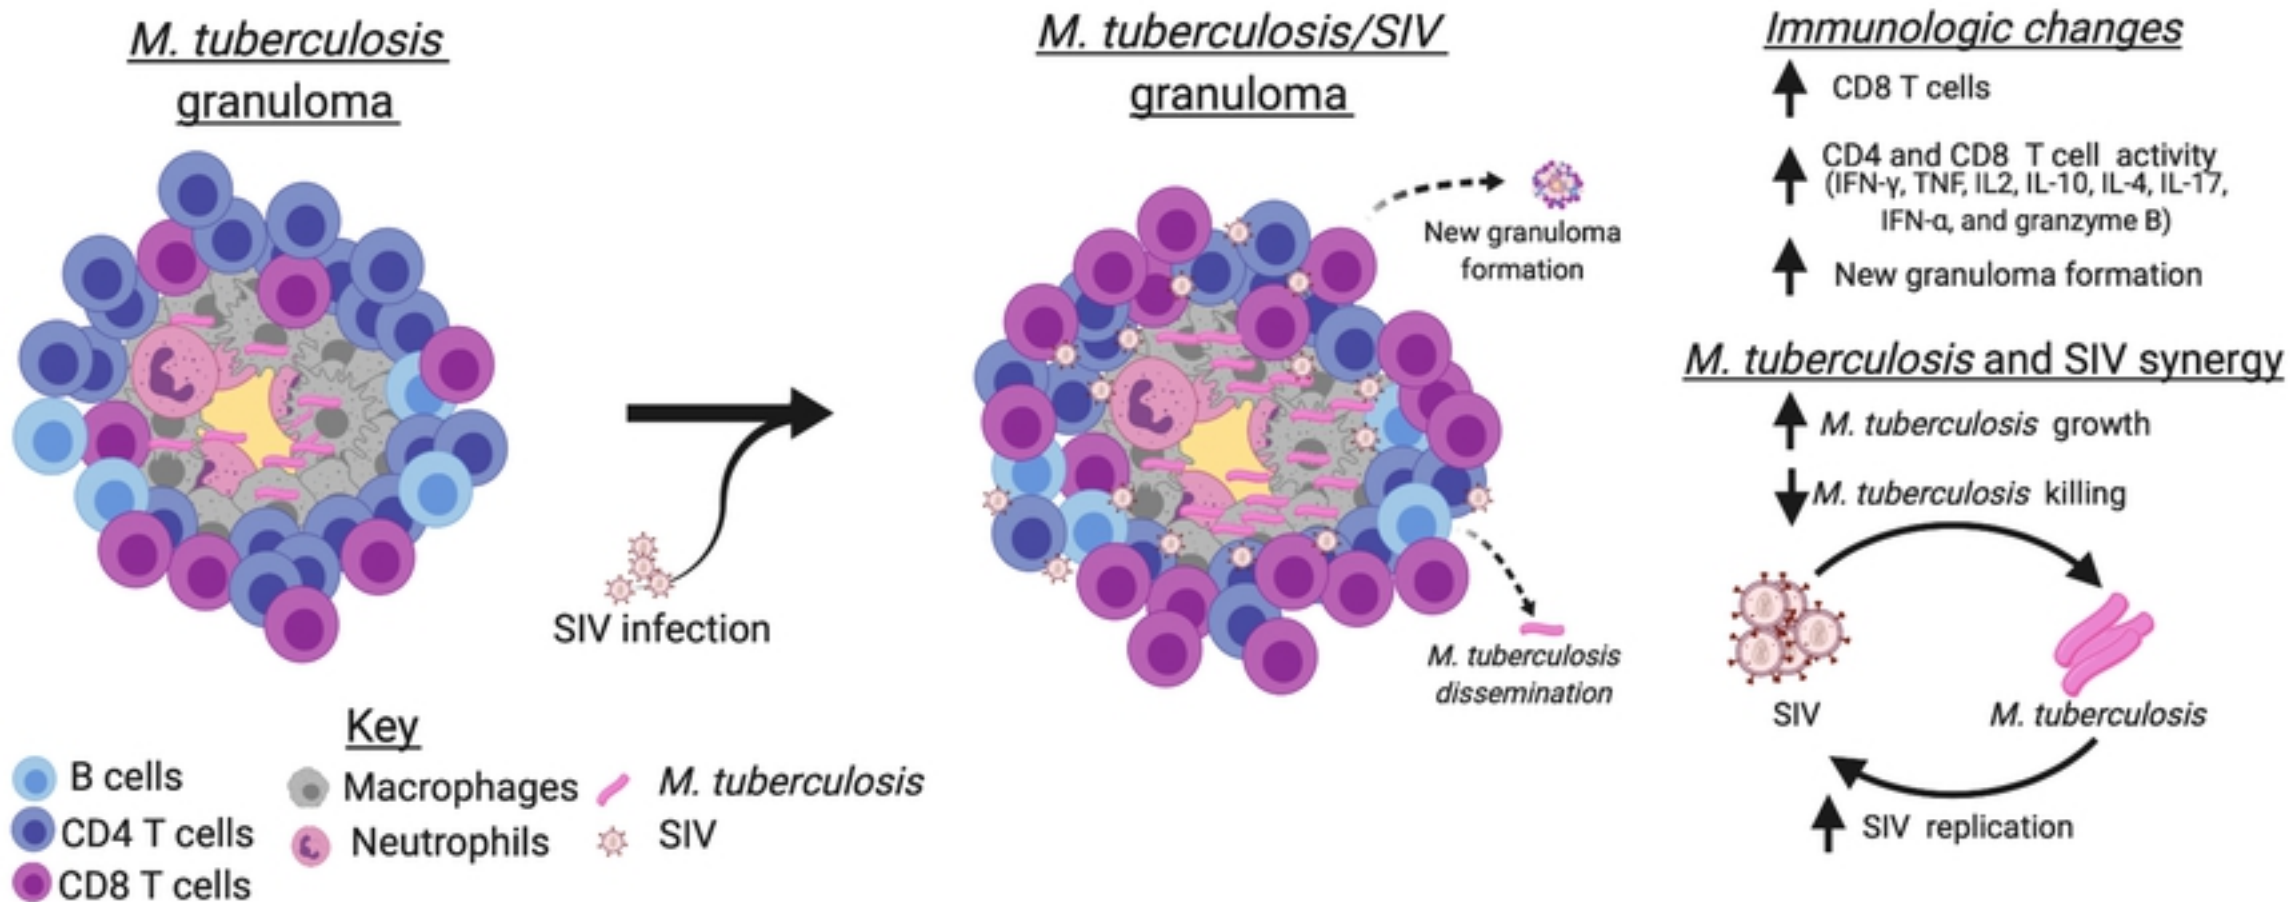

Figure 7
